# Supplementary material for: Distinct Types of Disorder in the Human Proteome: Functional Implications for Alternative Splicing
Source: PLoS Comput Biol. 2013 Apr 25;9(4):e1003030. doi: 10.1371/journal.pcbi.1003030 (PMC3635989; doi:10.1371/journal.pcbi.1003030)
Supplement: Table S1 — The Gene Ontology (GO) along with respective enrichment p-values, for proteins of high content of flexible and constrained disorder. The protein is classified as either constrained disorder or flexible disorder if constrained (or flexible) disorder is the dominating class among 4 different classes: constrained disorder, flexible disorder, ordered, and non-conserved. (XLS) [file pcbi.1003030.s009.xls]

## Sheet: Constrained disorder
Supplementary Table: Functionnal analysis of proteins enriched in constrained disorder
List of GO terms (identified by their name) over-represented in proteins enriched in constrained disorder. P-values are adjusted for multiple testing by Benjamin-Hocheberg method. Terms with FDR < 5% are considered significant and in bold.
GO term name	P-values	FDR
negative regulation of protein import into nucleus	0	0
fibroblast migration	1e-10	3.86e-09
face development	1e-10	3.86e-09
vasculature development	1e-10	3.86e-09
smooth muscle tissue development	1e-10	3.86e-09
respiratory system process	8.5e-09	2.34357e-07
spermatid nucleus differentiation	7.6e-09	2.34357e-07
sequestering of actin monomers	5.638e-07	6.04519e-06
cellular response to lipopolysaccharide	5.638e-07	6.04519e-06
negative regulation of granulocyte differentiation	5.638e-07	6.04519e-06
negative regulation of macrophage differentiation	5.638e-07	6.04519e-06
positive regulation of nuclease activity	5.638e-07	6.04519e-06
DNA ligation involved in DNA repair	5.638e-07	6.04519e-06
positive regulation of megakaryocyte differentiation	5.638e-07	6.04519e-06
V(D)J recombination	5.638e-07	6.04519e-06
base excision repair DNA ligation	5.638e-07	6.04519e-06
positive regulation of DNA binding	5.638e-07	6.04519e-06
cell chemotaxis	5.638e-07	6.04519e-06
collagen biosynthetic process	4.41942e-05	0.000185423
embryonic organ development	4.41942e-05	0.000185423
epithelial tube branching involved in lung morphogenesis	4.41942e-05	0.000185423
activated T cell proliferation	4.41942e-05	0.000185423
myeloid cell homeostasis	4.41942e-05	0.000185423
sexual reproduction	4.41942e-05	0.000185423
positive regulation by host of viral transcription	4.41942e-05	0.000185423
regulation of G2 M transition of mitotic cell cycle	4.41942e-05	0.000185423
post embryonic organ morphogenesis	4.41942e-05	0.000185423
definitive hemopoiesis	4.41942e-05	0.000185423
chromatin silencing at rDNA	4.41942e-05	0.000185423
proteoglycan metabolic process	4.41942e-05	0.000185423
protein heterotrimerization	4.41942e-05	0.000185423
tube formation	4.41942e-05	0.000185423
cartilage development involved in endochondral bone morphogenesis	4.41942e-05	0.000185423
detection of mechanical stimulus involved in sensory perception of sound	4.41942e-05	0.000185423
reflex	4.41942e-05	0.000185423
embryonic camera type eye morphogenesis	4.41942e-05	0.000185423
positive regulation of G protein coupled receptor protein signaling pathway	4.41942e-05	0.000185423
negative regulation of translational initiation	4.41942e-05	0.000185423
CD8 positive alpha beta T cell differentiation	4.41942e-05	0.000185423
megakaryocyte differentiation	4.41942e-05	0.000185423
regulation of developmental pigmentation	4.41942e-05	0.000185423
proteasome assembly	4.41942e-05	0.000185423
regulation of neurotransmitter secretion	4.41942e-05	0.000185423
negative regulation of catalytic activity	4.41942e-05	0.000185423
positive regulation of transcription from RNA polymerase I promoter	4.41942e-05	0.000185423
enucleate erythrocyte differentiation	4.41942e-05	0.000185423
natural killer cell differentiation	0.00388555	0.00547381
pancreatic PP cell fate commitment	0.00388555	0.00547381
positive regulation of smooth muscle cell differentiation	0.00388555	0.00547381
interleukin 6 mediated signaling pathway	0.00388555	0.00547381
response to fluid shear stress	0.00388555	0.00547381
lung epithelial cell differentiation	0.00388555	0.00547381
detection of mechanical stimulus	0.00388555	0.00547381
response to dietary excess	0.00388555	0.00547381
anterior compartment pattern formation	0.00388555	0.00547381
sensory perception of touch	0.00388555	0.00547381
tube morphogenesis	0.00388555	0.00547381
secretory columnal luminar epithelial cell differentiation involved in prostate glandular acinus development	0.00388555	0.00547381
negative regulation of epithelial cell migration	0.00388555	0.00547381
detection of mechanical stimulus involved in equilibrioception	0.00388555	0.00547381
carbohydrate mediated signaling	0.00388555	0.00547381
cell motility	0.00388555	0.00547381
positive regulation of striated muscle cell differentiation	0.00388555	0.00547381
acetylcholine catabolic process in synaptic cleft	0.00388555	0.00547381
leading edge cell differentiation	0.00388555	0.00547381
epithelial cell proliferation involved in prostatic bud elongation	0.00388555	0.00547381
kidney morphogenesis	0.00388555	0.00547381
negative regulation of translation involved in gene silencing by miRNA	0.00388555	0.00547381
transcription initiation from RNA polymerase I promoter	0.00388555	0.00547381
otic vesicle formation	0.00388555	0.00547381
intramembranous ossification	0.00388555	0.00547381
skeletal muscle thin filament assembly	0.00388555	0.00547381
musculoskeletal movement	0.00388555	0.00547381
positive regulation of fatty acid oxidation	0.00388555	0.00547381
hypothalamus development	0.00388555	0.00547381
visceral motor neuron differentiation	0.00388555	0.00547381
calcium ion dependent exocytosis of neurotransmitter	0.00388555	0.00547381
fertilization exchange of chromosomal proteins	0.00388555	0.00547381
trigeminal nerve development	0.00388555	0.00547381
glial cell fate commitment	0.00388555	0.00547381
ephrin receptor signaling pathway	0.00388555	0.00547381
cellular protein complex disassembly	0.00388555	0.00547381
protein import into mitochondrial inner membrane	0.00388555	0.00547381
positive regulation of transcription from RNA polymerase II promoter global	0.00388555	0.00547381
detection of chemical stimulus	0.00388555	0.00547381
pancreatic A cell fate commitment	0.00388555	0.00547381
male sex determination	0.00388555	0.00547381
asymmetric protein localization	0.00388555	0.00547381
epithelial mesenchymal signaling involved in prostate gland development	0.00388555	0.00547381
regulation of protein heterodimerization activity	0.00388555	0.00547381
diencephalon morphogenesis	0.00388555	0.00547381
negative regulation of cell substrate adhesion	0.00388555	0.00547381
endochondral bone morphogenesis	0.00388555	0.00547381
negative regulation of immune response	0.00388555	0.00547381
hyperosmotic response	0.00388555	0.00547381
positive regulation of T cell cytokine production	0.00388555	0.00547381
response to laminar fluid shear stress	0.00388555	0.00547381
negative regulation of secretion	0.00388555	0.00547381
neuron fate specification	0.00388555	0.00547381
regulation of actin polymerization or depolymerization	0.00388555	0.00547381
monocyte differentiation	0.00388555	0.00547381
cellular response to retinoic acid	0.00388555	0.00547381
negative regulation of bone mineralization	0.00388555	0.00547381
sensory perception of mechanical stimulus	0.00388555	0.00547381
prostate gland morphogenesis	0.00388555	0.00547381
phagocytosis recognition	0.00388555	0.00547381
transcription termination	0.00388555	0.00547381
penile erection	0.00388555	0.00547381
neurotransmitter uptake	0.00388555	0.00547381
posterior compartment specification	0.00388555	0.00547381
detection of temperature stimulus	0.00388555	0.00547381
olfactory placode formation	0.00388555	0.00547381
positive regulation of Notch signaling pathway	0.00388555	0.00547381
lens induction in camera type eye	0.00388555	0.00547381
pigment biosynthetic process	0.00388555	0.00547381
branching morphogenesis of a nerve	0.00388555	0.00547381
cellular response to potassium ion starvation	0.00388555	0.00547381
PML body organization	0.00388555	0.00547381
regulation of extracellular matrix disassembly	0.00388555	0.00547381
positive regulation of Wnt receptor signaling pathway through beta catenin	0.00388555	0.00547381
spermatid nucleus elongation	0.00388555	0.00547381
general transcription from RNA polymerase II promoter	0.00388555	0.00547381
cerebral cortex GABAergic interneuron differentiation	0.00388555	0.00547381
lymphocyte homeostasis	0.00388555	0.00547381
phospholipid dephosphorylation	0.00388555	0.00547381
Sertoli cell differentiation	0.00388555	0.00547381
cardiac muscle fiber development	0.00388555	0.00547381
chondrocyte development	0.00388555	0.00547381
regulation of synaptogenesis	0.00388555	0.00547381
positive regulation of interleukin 2 production	0.00388555	0.00547381
male germ line sex determination	0.00388555	0.00547381
cerebral cortex GABAergic interneuron fate commitment	0.00388555	0.00547381
regulation of transcription from RNA polymerase II promoter involved in forebrain neuron fate commitment	0.00388555	0.00547381
bone trabecula formation	0.00388555	0.00547381
ventricular cardiac muscle cell differentiation	0.00388555	0.00547381
embryonic skeletal joint morphogenesis	0.00388555	0.00547381
skeletal muscle thick filament assembly	0.00388555	0.00547381
response to retinoic acid	0.0723302	0.0990052
negative regulation of ubiquitin protein ligase activity involved in mitotic cell cycle	0.0723302	0.0990052
digestion	0.0723302	0.0990052
positive regulation of ubiquitin protein ligase activity involved in mitotic cell cycle	0.0723302	0.0990052
transmembrane receptor protein tyrosine kinase signaling pathway	0.072884	0.0990606
response to stimulus	0.148522	0.200453
cell morphogenesis	0.204975	0.272828
integrin mediated signaling pathway	0.204975	0.272828
metabolic process	0.211263	0.279272
small GTPase mediated signal transduction	0.229796	0.301705
oxidation reduction	0.273111	0.353762
carbohydrate metabolic process	0.273111	0.353762
transmembrane transport	0.276798	0.356147
ubiquitin dependent protein catabolic process	0.298561	0.381604
aging	0.355151	0.450948
lipid metabolic process	0.396256	0.499852
proteolysis	0.438782	0.549903
regulation of small GTPase mediated signal transduction	0.488725	0.60464
antigen processing and presentation	0.488725	0.60464
calcium ion transport	0.548916	0.666294
elevation of cytosolic calcium ion concentration	0.548916	0.666294
sodium ion transport	0.548916	0.666294
response to toxin	0.624745	0.72201
translational initiation	0.624745	0.72201
locomotory behavior	0.624745	0.72201
tRNA aminoacylation for protein translation	0.624745	0.72201
cell redox homeostasis	0.624745	0.72201
cation transport	0.624745	0.72201
regulation of Rab GTPase activity	0.624745	0.72201
nucleocytoplasmic transport	0.624745	0.72201
DNA metabolic process	0.729785	0.741308
cytokinesis	0.729785	0.741308
amino acid transport	0.729785	0.741308
biosynthetic process	0.729785	0.741308
lipid transport	0.729785	0.741308
homophilic cell adhesion	0.729785	0.741308
fatty acid biosynthetic process	0.729785	0.741308
regulation of protein metabolic process	0.729785	0.741308
UTP biosynthetic process	0.729785	0.741308
cellular metabolic process	0.729785	0.741308
lipoprotein metabolic process	0.729785	0.741308
Ras protein signal transduction	0.729785	0.741308
protein amino acid glycosylation	0.729785	0.741308
excretion	0.729785	0.741308
cholesterol homeostasis	0.729785	0.741308
positive regulation of anti apoptosis	0.729785	0.741308
memory	0.729785	0.741308
ER to Golgi vesicle mediated transport	0.729785	0.741308
ATP synthesis coupled proton transport	0.729785	0.741308
GTP biosynthetic process	0.729785	0.741308
CTP biosynthetic process	0.729785	0.741308
fatty acid metabolic process	0.729785	0.741308
positive regulation of protein amino acid phosphorylation	0.729785	0.741308
G protein coupled receptor protein signaling pathway	0.979997	0.979997
translation	0.979997	0.979997
ion transport	0.979997	0.979997

## Sheet: Flexible disorder
Supplementary Table: Functionnal analysis of proteins enriched in flexible disorder
List of GO terms (identified by their name) over-represented in proteins enriched in flexible disorder. P-values are adjusted for multiple testing by Benjamin-Hocheberg method. Terms with FDR < 5% are considered significant and in bold.
GO term name	P-values	FDR
cartilage development	0	0
negative regulation of transcription from RNA polymerase II promoter	0	0
collagen fibril organization	1.3e-09	8.18567e-07
skeletal system morphogenesis	3.6e-09	1.7001e-06
platelet derived growth factor receptor signaling pathway	5.47e-08	2.06657e-05
chromatin organization	9.11e-08	2.86813e-05
negative regulation of protein kinase activity	3.517e-07	9.49088e-05
positive regulation of transcription from RNA polymerase II promoter	2.5256e-06	0.000477086
keratinization	2.4934e-06	0.000477086
embryonic skeletal system development	2.4934e-06	0.000477086
negative regulation of transcription DNA dependent	3.2077e-06	0.00055085
protein homooligomerization	4.3843e-06	0.000690162
positive regulation of erythrocyte differentiation	9.1595e-06	0.00115349
response to steroid hormone stimulus	9.1595e-06	0.00115349
embryonic pattern specification	9.1595e-06	0.00115349
palate development	1.03994e-05	0.00122778
embryonic skeletal system morphogenesis	2.16069e-05	0.00240091
forebrain neuron differentiation	3.17862e-05	0.00300221
cilium assembly	3.17862e-05	0.00300221
embryonic process involved in female pregnancy	3.17862e-05	0.00300221
inner ear morphogenesis	3.47145e-05	0.00312265
angiogenesis	4.66587e-05	0.00400629
gamete generation	6.99048e-05	0.00507885
osteoblast development	6.99048e-05	0.00507885
epidermal growth factor receptor signaling pathway	6.99048e-05	0.00507885
cardiac muscle cell differentiation	6.99048e-05	0.00507885
male gonad development	0.000106291	0.00743641
cartilage condensation	0.000361616	0.0213466
response to cAMP	0.000361616	0.0213466
microtubule bundle formation	0.000361616	0.0213466
regulation of mitotic spindle organization	0.000361616	0.0213466
complement activation classical pathway	0.000361616	0.0213466
regulation of gene expression	0.00051336	0.0277068
negative regulation of Wnt receptor signaling pathway through beta catenin	0.00051336	0.0277068
nuclear mRNA splicing via spliceosome	0.00051336	0.0277068
in utero embryonic development	0.000595587	0.0312518
chromatin remodeling	0.00101733	0.0519389
regulation of transcription DNA dependent	0.00110657	0.055008
adrenal gland development	0.00171644	0.0599418
negative regulation of T helper 2 cell differentiation	0.00171644	0.0599418
endochondral ossification	0.00184046	0.0599418
epithelial cell proliferation	0.00171644	0.0599418
cell fate specification	0.00171644	0.0599418
maintenance of protein location in nucleus	0.00171644	0.0599418
skin morphogenesis	0.00171644	0.0599418
inner ear development	0.00184046	0.0599418
positive regulation of T helper 1 cell differentiation	0.00171644	0.0599418
regulation of neuronal synaptic plasticity	0.00171644	0.0599418
regulation of transcription from RNA polymerase I promoter	0.00171644	0.0599418
mitotic metaphase plate congression	0.00184046	0.0599418
insulin secretion	0.00184046	0.0599418
embryonic placenta development	0.00184046	0.0599418
fat cell differentiation	0.00184046	0.0599418
T cell homeostasis	0.00171644	0.0599418
B cell homeostasis	0.00171644	0.0599418
CD4 positive alpha beta T cell differentiation	0.00171644	0.0599418
histone H3 K4 methylation	0.00171644	0.0599418
histone mRNA 3 prime end processing	0.00171644	0.0599418
negative regulation of gene expression	0.00243379	0.0779226
regulation of signal transduction	0.00270423	0.0837423
negative regulation of signal transduction	0.00270423	0.0837423
embryonic development	0.00334845	0.10202
innate immune response	0.00451872	0.13549
negative regulation of transcription	0.0046619	0.137599
liver development	0.0059019	0.150658
regulation of cell migration	0.0059019	0.150658
defense response	0.0059019	0.150658
thymus development	0.0059019	0.150658
trophectodermal cell differentiation	0.0059019	0.150658
phosphoinositide mediated signaling	0.0059019	0.150658
lung development	0.00585578	0.150658
blood vessel development	0.00585578	0.150658
cellular defense response	0.00585578	0.150658
positive regulation of endothelial cell proliferation	0.0059019	0.150658
skeletal system development	0.00633524	0.159564
sensory perception of sound	0.0077461	0.190031
potassium ion transport	0.0077461	0.190031
regulation of organ growth	0.0110075	0.238857
negative regulation of Wnt receptor signaling pathway	0.0111273	0.238857
ear development	0.0110075	0.238857
epithelial cell differentiation	0.0110075	0.238857
cellular process	0.0110075	0.238857
regulation of insulin secretion	0.0110075	0.238857
negative regulation of cell differentiation	0.0110075	0.238857
transforming growth factor beta receptor signaling pathway	0.0111273	0.238857
T cell activation	0.0110075	0.238857
dorsal spinal cord development	0.0110075	0.238857
B cell apoptosis	0.0110075	0.238857
RNA splicing via transesterification reactions	0.0141602	0.290747
negative regulation of neuron differentiation	0.0141602	0.290747
positive regulation of microtubule polymerization	0.0141602	0.290747
spleen development	0.0141602	0.290747
cell cycle arrest	0.018889	0.38367
regulation of growth	0.0191183	0.384196
induction of apoptosis	0.0195236	0.388212
visual perception	0.0231097	0.450043
Wnt receptor signaling pathway	0.0231097	0.450043
positive regulation of gene specific transcription from RNA polymerase II promoter	0.0247429	0.476933
neuron migration	0.0273998	0.498534
RNA elongation from RNA polymerase II promoter	0.0279749	0.498534
positive regulation of gene specific transcription	0.0279749	0.498534
cell death	0.0277516	0.498534
endosome transport	0.0279749	0.498534
glucose homeostasis	0.0279749	0.498534
regulation of transcription	0.0277362	0.498534
cell fate commitment	0.0279749	0.498534
positive regulation of transcription	0.0292302	0.516037
negative regulation of cell growth	0.0303434	0.525859
kidney development	0.0303434	0.525859
pituitary gland development	0.0340555	0.569299
response to hydrogen peroxide	0.0340555	0.569299
neural crest cell development	0.0340555	0.569299
histone methylation	0.0340555	0.569299
DNA repair	0.041989	0.695765
tRNA processing	0.488725	0.746784
somite rostral caudal axis specification	0.624745	0.746784
positive regulation of mitosis	0.250313	0.746784
facial nucleus development	0.624745	0.746784
positive regulation of protein ubiquitination	0.327129	0.746784
negative regulation of collateral sprouting of intact axon in response to injury	0.729785	0.746784
blastocyst growth	0.729785	0.746784
melanosome organization	0.548916	0.746784
DNA metabolic process	0.729785	0.746784
RNA metabolic process	0.548916	0.746784
retinal bipolar neuron differentiation	0.204975	0.746784
protein oligomerization	0.488725	0.746784
positive regulation of peptidyl threonine phosphorylation	0.729785	0.746784
cell migration involved in gastrulation	0.548916	0.746784
positive regulation of proteasomal ubiquitin dependent protein catabolic process	0.624745	0.746784
positive regulation of translation	0.438782	0.746784
leukocyte cell cell adhesion	0.729785	0.746784
positive regulation of gene specific transcription involved in unfolded protein response	0.729785	0.746784
cytokinesis after mitosis	0.396256	0.746784
cell morphogenesis	0.204975	0.746784
response to virus	0.438782	0.746784
chylomicron remodeling	0.729785	0.746784
male genitalia development	0.355151	0.746784
proximal distal pattern formation	0.584841	0.746784
negative regulation of circadian sleep wake cycle REM sleep	0.729785	0.746784
positive regulation of cell differentiation	0.488725	0.746784
death	0.729785	0.746784
positive regulation of cGMP biosynthetic process	0.396256	0.746784
late viral mRNA transcription	0.729785	0.746784
myelination in the peripheral nervous system	0.624745	0.746784
actin filament organization	0.327129	0.746784
chloride transport	0.396256	0.746784
double strand break repair via homologous recombination	0.229796	0.746784
keratinocyte migration	0.729785	0.746784
protein folding	0.152618	0.746784
regulation of Rho protein signal transduction	0.298561	0.746784
axon guidance	0.503715	0.746784
positive regulation of monocyte differentiation	0.355151	0.746784
embryonic gut development	0.548916	0.746784
calcium ion dependent exocytosis	0.624745	0.746784
antigen processing and presentation of exogenous peptide antigen via MHC class II	0.729785	0.746784
cytokinesis	0.729785	0.746784
spliceosome assembly	0.548916	0.746784
mitotic spindle organization	0.355151	0.746784
exocrine pancreas development	0.548916	0.746784
positive regulation of phagocytosis	0.548916	0.746784
tachykinin receptor signaling pathway	0.548916	0.746784
axonal fasciculation	0.729785	0.746784
regulation of epithelial cell proliferation	0.729785	0.746784
DNA damage response signal transduction by p53 class mediator resulting in cell cycle arrest	0.624745	0.746784
ribosome biogenesis	0.359421	0.746784
positive regulation of leukocyte chemotaxis	0.729785	0.746784
apoptotic chromosome condensation	0.729785	0.746784
negative regulation of I kappaB kinase NF kappaB cascade	0.729785	0.746784
synaptonemal complex assembly	0.488725	0.746784
regulation of dendritic spine morphogenesis	0.624745	0.746784
regulation of mitotic recombination	0.729785	0.746784
lens development in camera type eye	0.50145	0.746784
rRNA methylation	0.624745	0.746784
glucocorticoid biosynthetic process	0.729785	0.746784
retinoic acid receptor signaling pathway	0.548916	0.746784
reactivation of latent virus	0.729785	0.746784
glutamine metabolic process	0.729785	0.746784
regulation of anti apoptosis	0.548916	0.746784
activation of store operated calcium channel activity	0.729785	0.746784
positive regulation of signal transduction	0.624745	0.746784
negative regulation of type IV hypersensitivity	0.624745	0.746784
RNA transport	0.729785	0.746784
response to exogenous dsRNA	0.729785	0.746784
establishment of protein localization	0.488725	0.746784
positive regulation of cell division	0.298561	0.746784
release of cytochrome c from mitochondria	0.355151	0.746784
rhombomere 5 development	0.624745	0.746784
glial cell differentiation	0.488725	0.746784
regulation of steroid hormone receptor signaling pathway	0.729785	0.746784
negative regulation of gene specific transcription from RNA polymerase II promoter	0.229796	0.746784
glucose metabolic process	0.327129	0.746784
DNA duplex unwinding	0.729785	0.746784
SMAD protein nuclear translocation	0.204975	0.746784
equilibrioception	0.729785	0.746784
positive regulation of transcription DNA dependent	0.605969	0.746784
oligodendrocyte differentiation	0.50145	0.746784
tissue morphogenesis	0.729785	0.746784
negative regulation of amyloid precursor protein biosynthetic process	0.729785	0.746784
negative regulation of gene expression epigenetic	0.729785	0.746784
positive regulation of apoptosis	0.6558	0.746784
assembly of spliceosomal tri snRNP	0.624745	0.746784
positive regulation of protein oligomerization	0.548916	0.746784
regulation of cell matrix adhesion	0.624745	0.746784
axon ensheathment	0.488725	0.746784
Schwann cell development	0.624745	0.746784
positive thymic T cell selection	0.548916	0.746784
positive regulation of mesenchymal cell proliferation	0.50145	0.746784
cell cell junction maintenance	0.624745	0.746784
negative regulation of DNA metabolic process	0.624745	0.746784
regulation of epidermal cell differentiation	0.548916	0.746784
antigen receptor mediated signaling pathway	0.729785	0.746784
learning	0.204975	0.746784
negative regulation of smooth muscle cell apoptosis	0.729785	0.746784
positive regulation of mitochondrial depolarization	0.548916	0.746784
cardiac muscle contraction	0.204975	0.746784
segment specification	0.624745	0.746784
positive regulation of cell proliferation	0.625302	0.746784
regulation of vasoconstriction	0.488725	0.746784
mitotic sister chromatid cohesion	0.729785	0.746784
neutrophil chemotaxis	0.624745	0.746784
positive regulation of transcription via serum response element binding	0.624745	0.746784
hypothalamus cell differentiation	0.729785	0.746784
axon cargo transport	0.729785	0.746784
maintenance of mitotic sister chromatid cohesion	0.729785	0.746784
histone H3 acetylation	0.503715	0.746784
growth plate cartilage development	0.729785	0.746784
response to endoplasmic reticulum stress	0.729785	0.746784
myoblast migration	0.729785	0.746784
limb morphogenesis	0.636731	0.746784
diaphragm development	0.729785	0.746784
cell cell junction assembly	0.548916	0.746784
eye development	0.50145	0.746784
activation of pro apoptotic gene products	0.072884	0.746784
nervous system development	0.450607	0.746784
glycoprotein metabolic process	0.548916	0.746784
myeloid progenitor cell differentiation	0.729785	0.746784
epithelial cell maturation	0.729785	0.746784
extraocular skeletal muscle development	0.729785	0.746784
positive regulation of protein kinase B signaling cascade	0.359421	0.746784
positive regulation of cell cell adhesion	0.0723302	0.746784
locomotor rhythm	0.729785	0.746784
cell development	0.355151	0.746784
smoothened signaling pathway involved in ventral spinal cord interneuron specification	0.488725	0.746784
positive regulation of T helper 2 cell differentiation	0.624745	0.746784
insulin receptor signaling pathway	0.725096	0.746784
hair follicle morphogenesis	0.624745	0.746784
response to UV B	0.729785	0.746784
glial cell migration	0.624745	0.746784
paraxial mesodermal cell fate commitment	0.729785	0.746784
response to fungus	0.548916	0.746784
viral genome replication	0.729785	0.746784
histone monoubiquitination	0.624745	0.746784
autophagic cell death	0.729785	0.746784
nuclear pore complex assembly	0.729785	0.746784
midbrain development	0.624745	0.746784
positive regulation of systemic arterial blood pressure	0.729785	0.746784
tooth mineralization	0.0723302	0.746784
fusion of sperm to egg plasma membrane	0.729785	0.746784
positive regulation of B cell proliferation	0.438782	0.746784
ventricular septum morphogenesis	0.624745	0.746784
cellular response to indole 3 methanol	0.548916	0.746784
cardiac ventricle morphogenesis	0.729785	0.746784
cell migration involved in sprouting angiogenesis	0.729785	0.746784
protein targeting to peroxisome	0.729785	0.746784
cerebral cortex development	0.50145	0.746784
reproductive developmental process	0.624745	0.746784
regulation of protein kinase activity	0.548916	0.746784
positive regulation vascular endothelial growth factor production	0.729785	0.746784
blood vessel remodeling	0.488725	0.746784
positive regulation of tyrosine phosphorylation of Stat5 protein	0.729785	0.746784
negative regulation of stress activated MAPK cascade	0.729785	0.746784
positive regulation of kinase activity	0.729785	0.746784
spermatogenesis exchange of chromosomal proteins	0.548916	0.746784
placenta blood vessel development	0.729785	0.746784
positive regulation of protein export from nucleus	0.729785	0.746784
regulation of alternative nuclear mRNA splicing via spliceosome	0.548916	0.746784
regulation of macrophage activation	0.729785	0.746784
male meiosis I	0.396256	0.746784
blood circulation	0.50145	0.746784
regulation of protein homodimerization activity	0.0723302	0.746784
regulation of osteoclast differentiation	0.488725	0.746784
respiratory system development	0.729785	0.746784
glycolate metabolic process	0.729785	0.746784
positive regulation of stress fiber assembly	0.624745	0.746784
dorsal ventral axis specification	0.548916	0.746784
positive regulation of neuron differentiation	0.04821	0.746784
amino acid transport	0.729785	0.746784
female pregnancy	0.612449	0.746784
spindle assembly	0.488725	0.746784
polysaccharide catabolic process	0.624745	0.746784
commissural neuron differentiation in the spinal cord	0.729785	0.746784
histone acetylation	0.438782	0.746784
blood vessel morphogenesis	0.624745	0.746784
positive regulation of response to cytokine stimulus	0.624745	0.746784
meiotic sister chromatid cohesion centromeric	0.729785	0.746784
negative regulation of transport	0.729785	0.746784
regulation of ossification	0.204975	0.746784
positive regulation of collagen biosynthetic process	0.624745	0.746784
regulation of excitatory postsynaptic membrane potential	0.438782	0.746784
protein localization to chromosome telomeric region	0.729785	0.746784
positive regulation of transforming growth factor beta1 production	0.729785	0.746784
positive regulation of smoothened signaling pathway	0.0723302	0.746784
positive regulation of cell matrix adhesion	0.624745	0.746784
spermatid development	0.126077	0.746784
positive regulation of cell cell adhesion mediated by integrin	0.729785	0.746784
cardiac muscle tissue morphogenesis	0.0723302	0.746784
negative regulation of alpha beta T cell proliferation	0.729785	0.746784
neuromuscular synaptic transmission	0.548916	0.746784
neuroprotection	0.359421	0.746784
positive regulation of axon extension	0.438782	0.746784
telomere assembly	0.729785	0.746784
positive regulation of cytotoxic T cell differentiation	0.729785	0.746784
G2 M transition checkpoint	0.438782	0.746784
catagen	0.729785	0.746784
female gonad development	0.488725	0.746784
regulation of blood vessel size	0.50145	0.746784
N terminal peptidyl L cysteine N palmitoylation	0.729785	0.746784
cilium movement	0.729785	0.746784
regulation of hormone secretion	0.729785	0.746784
positive regulation of glucose import	0.204975	0.746784
positive regulation of organ growth	0.548916	0.746784
post embryonic development	0.108788	0.746784
epithelial cell proliferation involved in mammary gland duct elongation	0.729785	0.746784
negative regulation of catenin protein nuclear translocation	0.729785	0.746784
negative regulation of JNK cascade	0.729785	0.746784
positive regulation of embryonic development	0.729785	0.746784
positive regulation of phosphorylation	0.488725	0.746784
endoderm development	0.729785	0.746784
negative regulation of protein amino acid autophosphorylation	0.0723302	0.746784
male somatic sex determination	0.729785	0.746784
lacrimal gland development	0.729785	0.746784
G2 M transition of mitotic cell cycle	0.548916	0.746784
positive regulation of mast cell cytokine production	0.548916	0.746784
positive regulation of focal adhesion assembly	0.624745	0.746784
T cell proliferation	0.624745	0.746784
female gamete generation	0.548916	0.746784
cellular protein localization	0.396256	0.746784
regulation of BMP signaling pathway	0.729785	0.746784
pancreatic juice secretion	0.729785	0.746784
digestive system development	0.548916	0.746784
nuclear transcribed mRNA catabolic process deadenylation dependent decay	0.729785	0.746784
tongue development	0.0723302	0.746784
satellite cell maintenance involved in skeletal muscle regeneration	0.729785	0.746784
negative regulation of striated muscle tissue development	0.729785	0.746784
melanosome localization	0.729785	0.746784
removal of superoxide radicals	0.729785	0.746784
rhythmic excitation	0.729785	0.746784
forebrain neuron development	0.729785	0.746784
regulation of hormone levels	0.729785	0.746784
negative regulation of synaptogenesis	0.729785	0.746784
positive regulation of JNK cascade	0.355151	0.746784
regulation of lipid metabolic process	0.624745	0.746784
regulation of prostatic bud formation	0.729785	0.746784
embryonic forelimb morphogenesis	0.438782	0.746784
nucleobase nucleoside nucleotide and nucleic acid metabolic process	0.396256	0.746784
atrioventricular node development	0.729785	0.746784
myoblast development	0.729785	0.746784
mesoderm formation	0.624745	0.746784
maturation of SSU rRNA from tricistronic rRNA transcript (SSU rRNA 5.8S rRNA LSU rRNA)	0.624745	0.746784
regulation of protein amino acid phosphorylation	0.729785	0.746784
regulation of gene specific transcription from RNA polymerase II promoter	0.729785	0.746784
alternative nuclear mRNA splicing via spliceosome	0.729785	0.746784
peripheral nervous system neuron development	0.729785	0.746784
negative regulation of DNA damage response signal transduction by p53 class mediator	0.548916	0.746784
response to estradiol stimulus	0.072884	0.746784
ruffle organization	0.438782	0.746784
innate immune response in mucosa	0.729785	0.746784
negative regulation of neuroblast proliferation	0.729785	0.746784
hindlimb morphogenesis	0.624745	0.746784
protein lipid complex assembly	0.729785	0.746784
erythrocyte differentiation	0.355151	0.746784
negative regulation of interleukin 2 biosynthetic process	0.729785	0.746784
secretion by cell	0.729785	0.746784
pattern specification process	0.211263	0.746784
negative regulation of skeletal muscle tissue development	0.729785	0.746784
S adenosylhomocysteine metabolic process	0.729785	0.746784
lymphocyte differentiation	0.729785	0.746784
mRNA transport	0.141017	0.746784
endocytosis	0.103471	0.746784
branching involved in mammary gland duct morphogenesis	0.624745	0.746784
positive regulation of Ras protein signal transduction	0.438782	0.746784
regulation of transcription from RNA polymerase II promoter involved in ventral spinal cord interneuron specification	0.624745	0.746784
negative regulation of hydrolase activity	0.729785	0.746784
protein import into mitochondrial matrix	0.729785	0.746784
biosynthetic process	0.729785	0.746784
transcription DNA dependent	0.298561	0.746784
regulation of ARF GTPase activity	0.152618	0.746784
activation of phospholipase D activity by G protein coupled receptor protein signaling pathway	0.729785	0.746784
positive regulation of actin filament polymerization	0.624745	0.746784
DNA methylation on cytosine	0.624745	0.746784
regulation of protein localization	0.438782	0.746784
actin modification	0.729785	0.746784
cellular response to hormone stimulus	0.624745	0.746784
positive regulation of viral transcription	0.729785	0.746784
embryonic digit morphogenesis	0.359421	0.746784
immunoglobulin mediated immune response	0.438782	0.746784
negative regulation of cardiac muscle cell apoptosis	0.0723302	0.746784
negative regulation of androgen receptor signaling pathway	0.624745	0.746784
bundle of His development	0.729785	0.746784
primitive streak formation	0.729785	0.746784
positive regulation of T cell differentiation	0.548916	0.746784
DNA mediated transformation	0.729785	0.746784
myoblast differentiation	0.729785	0.746784
glucose catabolic process	0.624745	0.746784
metabolic process	0.211263	0.746784
activation of prostate induction by androgen receptor signaling pathway	0.729785	0.746784
negative regulation of nitric oxide synthase biosynthetic process	0.729785	0.746784
endonucleolytic cleavage in ITS1 to separate SSU rRNA from 5.8S rRNA and LSU rRNA from tricistronic rRNA transcript (SSU rRNA 5.8S rRNA LSU rRNA)	0.624745	0.746784
Type I pneumocyte differentiation	0.729785	0.746784
positive regulation of transcription from RNA polymerase II promoter by glucose	0.729785	0.746784
intracellular transport	0.327129	0.746784
intracellular protein transport	0.105816	0.746784
positive regulation of vasodilation	0.488725	0.746784
DNA replication dependent nucleosome disassembly	0.624745	0.746784
positive regulation of protein import into nucleus	0.624745	0.746784
programmed cell death	0.729785	0.746784
lymphotoxin A biosynthetic process	0.548916	0.746784
regulation of respiratory burst	0.729785	0.746784
de novo actin filament nucleation	0.729785	0.746784
synaptic vesicle to endosome fusion	0.729785	0.746784
hemopoiesis	0.359421	0.746784
hormone mediated signaling pathway	0.298561	0.746784
cilium axoneme assembly	0.729785	0.746784
response to ethanol	0.438782	0.746784
negative regulation of T helper cell differentiation	0.729785	0.746784
age dependent telomere shortening	0.729785	0.746784
regulation of axonogenesis	0.729785	0.746784
regulation of protein complex assembly	0.729785	0.746784
mitotic metaphase	0.729785	0.746784
gene expression	0.548916	0.746784
embryonic heart tube left right pattern formation	0.729785	0.746784
embryonic cleavage	0.729785	0.746784
kinetochore organization	0.729785	0.746784
DNA damage response signal transduction by p53 class mediator resulting in transcription of p21 class mediator	0.438782	0.746784
cell differentiation in hindbrain	0.729785	0.746784
endoplasmic reticulum unfolded protein response	0.624745	0.746784
vesicle organization	0.548916	0.746784
response to toxin	0.624745	0.746784
regulation of DNA dependent DNA replication initiation	0.729785	0.746784
negative regulation of endothelial cell proliferation	0.548916	0.746784
positive regulation of catalytic activity	0.624745	0.746784
stress granule assembly	0.729785	0.746784
regulation of protein catabolic process	0.548916	0.746784
mammary gland alveolus development	0.548916	0.746784
positive regulation of sarcomere organization	0.729785	0.746784
mammary gland development	0.193703	0.746784
negative regulation of insulin receptor signaling pathway	0.729785	0.746784
mammary gland branching involved in thelarche	0.624745	0.746784
vein smooth muscle contraction	0.624745	0.746784
translational initiation	0.624745	0.746784
phototransduction	0.624745	0.746784
protein import into peroxisome matrix	0.729785	0.746784
intracellular signaling pathway	0.505899	0.746784
response to peptide hormone stimulus	0.355151	0.746784
tRNA splicing via endonucleolytic cleavage and ligation	0.729785	0.746784
melanocyte differentiation	0.729785	0.746784
skin development	0.0751924	0.746784
behavioral fear response	0.327129	0.746784
negative regulation of cell cycle	0.636731	0.746784
negative regulation of activin receptor signaling pathway	0.729785	0.746784
regulation of cardiac muscle contraction	0.729785	0.746784
negative regulation of smooth muscle cell migration	0.624745	0.746784
neuroblast proliferation	0.488725	0.746784
regulation of focal adhesion assembly	0.729785	0.746784
regulation of transcription involved in G1 S phase of mitotic cell cycle	0.729785	0.746784
intronless viral mRNA export from host nucleus	0.729785	0.746784
hippo signaling pathway	0.488725	0.746784
telomere maintenance via telomere shortening	0.729785	0.746784
neuron cell cell adhesion	0.729785	0.746784
lipid transport	0.729785	0.746784
negative regulation of nuclear mRNA splicing via spliceosome	0.624745	0.746784
B cell lineage commitment	0.729785	0.746784
soft palate development	0.548916	0.746784
regulation of muscle contraction	0.729785	0.746784
response to light stimulus	0.355151	0.746784
SMAD protein signal transduction	0.0723302	0.746784
negative regulation of T cell differentiation in the thymus	0.729785	0.746784
oocyte differentiation	0.624745	0.746784
MyD88 independent toll like receptor signaling pathway	0.729785	0.746784
histone H2A K63 linked ubiquitination	0.729785	0.746784
optic nerve morphogenesis	0.624745	0.746784
organ regeneration	0.624745	0.746784
regulation of translational initiation	0.355151	0.746784
positive regulation of transcription from RNA polymerase III promoter	0.729785	0.746784
tissue homeostasis	0.355151	0.746784
cellular response to interleukin 6	0.729785	0.746784
peroxisome membrane biogenesis	0.729785	0.746784
lipopolysaccharide mediated signaling pathway	0.729785	0.746784
apical protein localization	0.624745	0.746784
DNA dependent DNA replication initiation	0.624745	0.746784
atrial septum morphogenesis	0.729785	0.746784
regulation of establishment or maintenance of cell polarity	0.729785	0.746784
chordate embryonic development	0.729785	0.746784
protein targeting	0.548916	0.746784
artery development	0.624745	0.746784
endosome to lysosome transport	0.624745	0.746784
proteasomal ubiquitin dependent protein catabolic process	0.355151	0.746784
prostate gland development	0.548916	0.746784
positive regulation of sodium ion transport	0.729785	0.746784
regulation of mitosis	0.729785	0.746784
carboxylic acid metabolic process	0.488725	0.746784
synapse organization	0.624745	0.746784
axonogenesis	0.0866127	0.746784
limb development	0.624745	0.746784
homophilic cell adhesion	0.729785	0.746784
negative regulation of protein amino acid phosphorylation	0.548916	0.746784
early endosome to late endosome transport	0.729785	0.746784
regulation of cellular process	0.729785	0.746784
protein amino acid autophosphorylation	0.396256	0.746784
oxidation reduction	0.273111	0.746784
regulation of cellular component movement	0.729785	0.746784
response to axon injury	0.729785	0.746784
spinal cord oligodendrocyte cell fate specification	0.624745	0.746784
blastocyst development	0.488725	0.746784
cardiac conduction system development	0.729785	0.746784
retrograde vesicle mediated transport Golgi to ER	0.729785	0.746784
cerebellum development	0.0723302	0.746784
positive regulation of ERK1 and ERK2 cascade	0.624745	0.746784
positive regulation of glucagon secretion	0.624745	0.746784
regulation of caspase activity	0.204975	0.746784
brown fat cell differentiation	0.729785	0.746784
response to gamma radiation	0.624745	0.746784
regulation of developmental growth	0.624745	0.746784
response to retinoic acid	0.0723302	0.746784
rhombomere 3 development	0.729785	0.746784
epithelial cell maturation involved in prostate gland development	0.204975	0.746784
spindle assembly checkpoint	0.729785	0.746784
floor plate development	0.729785	0.746784
actin filament bundle assembly	0.548916	0.746784
smoothened signaling pathway involved in regulation of granule cell precursor cell proliferation	0.624745	0.746784
microvillus assembly	0.624745	0.746784
positive regulation of RNA polymerase II transcriptional preinitiation complex assembly	0.624745	0.746784
regulation of fever	0.729785	0.746784
post Golgi vesicle mediated transport	0.548916	0.746784
transmembrane transport	0.276798	0.746784
histone H2A ubiquitination	0.729785	0.746784
axon midline choice point recognition	0.729785	0.746784
activation of protein kinase C activity by G protein coupled receptor protein signaling pathway	0.396256	0.746784
response to starvation	0.548916	0.746784
sex determination	0.438782	0.746784
positive regulation of smooth muscle cell migration	0.729785	0.746784
nuclear mRNA 5 prime splice site recognition	0.729785	0.746784
T cell differentiation in the thymus	0.548916	0.746784
nuclear mRNA 3 prime splice site recognition	0.0723302	0.746784
negative regulation of angiogenesis	0.624745	0.746784
G1 S DNA damage checkpoint	0.729785	0.746784
response to vitamin A	0.729785	0.746784
tissue development	0.624745	0.746784
positive regulation of circadian sleep wake cycle wakefulness	0.729785	0.746784
tissue regeneration	0.729785	0.746784
nitric oxide homeostasis	0.488725	0.746784
protein localization at cell surface	0.624745	0.746784
mRNA export from nucleus	0.396256	0.746784
G1 S transition checkpoint	0.624745	0.746784
cytokine metabolic process	0.729785	0.746784
superoxide metabolic process	0.729785	0.746784
female meiosis I	0.729785	0.746784
regulation of microtubule polymerization	0.729785	0.746784
regulation of stress fiber assembly	0.624745	0.746784
filopodium assembly	0.548916	0.746784
thymic T cell selection	0.729785	0.746784
regulation of G protein coupled receptor protein signaling pathway	0.548916	0.746784
formation of immunological synapse	0.729785	0.746784
positive regulation of protein sumoylation	0.729785	0.746784
regulation of translation	0.148522	0.746784
regulation of protein amino acid ADP ribosylation	0.488725	0.746784
photoreceptor cell maintenance	0.548916	0.746784
response to xenobiotic stimulus	0.624745	0.746784
histone H2A K63 linked deubiquitination	0.729785	0.746784
placenta development	0.624745	0.746784
negative regulation of T cell activation	0.548916	0.746784
fatty acid biosynthetic process	0.729785	0.746784
calcium mediated signaling	0.548916	0.746784
positive regulation of ossification	0.729785	0.746784
I kappaB kinase NF kappaB cascade	0.488725	0.746784
nucleosome assembly	0.353683	0.746784
rhombomere 4 development	0.624745	0.746784
intermediate filament bundle assembly	0.729785	0.746784
intra S DNA damage checkpoint	0.729785	0.746784
tube development	0.488725	0.746784
long term memory	0.204975	0.746784
CenH3 containing nucleosome assembly at centromere	0.729785	0.746784
embryonic limb morphogenesis	0.148522	0.746784
chondrocyte differentiation	0.355151	0.746784
cellular pigment accumulation	0.624745	0.746784
thyroid gland development	0.548916	0.746784
negative regulation of mammary gland epithelial cell proliferation	0.729785	0.746784
positive regulation of osteoblast proliferation	0.729785	0.746784
positive regulation of insulin secretion	0.636731	0.746784
neuron projection regeneration	0.729785	0.746784
negative regulation of survival gene product expression	0.0723302	0.746784
Wnt receptor signaling pathway through beta catenin	0.438782	0.746784
estrogen metabolic process	0.729785	0.746784
interleukin 6 biosynthetic process	0.548916	0.746784
mammary gland duct morphogenesis	0.624745	0.746784
negative regulation of odontogenesis	0.548916	0.746784
oocyte maturation	0.488725	0.746784
intra Golgi vesicle mediated transport	0.624745	0.746784
behavior	0.548916	0.746784
insulin like growth factor receptor signaling pathway	0.548916	0.746784
cell differentiation	0.487806	0.746784
negative regulation of smooth muscle cell proliferation	0.624745	0.746784
positive regulation of calcium independent cell cell adhesion	0.729785	0.746784
regulation of synaptic plasticity	0.488725	0.746784
hindbrain morphogenesis	0.729785	0.746784
cerebral cortex tangential migration	0.729785	0.746784
anterior semicircular canal development	0.624745	0.746784
translational elongation	0.359421	0.746784
spinal cord motor neuron cell fate specification	0.624745	0.746784
regulation of protein metabolic process	0.729785	0.746784
lateral sprouting involved in mammary gland duct morphogenesis	0.729785	0.746784
peroxisome organization	0.624745	0.746784
vesicle transport along microtubule	0.729785	0.746784
actin cytoskeleton reorganization	0.729785	0.746784
negative regulation of T cell proliferation	0.438782	0.746784
mitotic sister chromatid segregation	0.729785	0.746784
G2 M transition DNA damage checkpoint	0.438782	0.746784
UTP biosynthetic process	0.729785	0.746784
regulation of intestinal cholesterol absorption	0.729785	0.746784
neurofilament cytoskeleton organization	0.729785	0.746784
actin filament reorganization involved in cell cycle	0.729785	0.746784
protein homotetramerization	0.624745	0.746784
regulation of double strand break repair via homologous recombination	0.729785	0.746784
regulation of gene specific transcription	0.359421	0.746784
transcription initiation	0.211263	0.746784
morphogenesis of follicular epithelium	0.729785	0.746784
mitotic metaphase anaphase transition	0.548916	0.746784
positive regulation of branching involved in ureteric bud morphogenesis	0.729785	0.746784
proteoglycan biosynthetic process	0.729785	0.746784
regulation of protein transport	0.624745	0.746784
regulation of calcium ion transport	0.729785	0.746784
locomotory behavior	0.624745	0.746784
regulation of hair cycle	0.729785	0.746784
adult feeding behavior	0.624745	0.746784
DNA damage response signal transduction by p53 class mediator resulting in induction of apoptosis	0.729785	0.746784
regulation of calcium ion transport via voltage gated calcium channel activity	0.729785	0.746784
negative regulation of oxygen and reactive oxygen species metabolic process	0.729785	0.746784
regulation of cell adhesion	0.624745	0.746784
T cell differentiation	0.50145	0.746784
negative regulation of mature B cell apoptosis	0.548916	0.746784
lateral semicircular canal development	0.624745	0.746784
generation of precursor metabolites and energy	0.190665	0.746784
monocyte activation	0.624745	0.746784
negative regulation of Rac protein signal transduction	0.729785	0.746784
cholesterol metabolic process	0.624745	0.746784
dephosphorylation	0.519399	0.746784
negative regulation of NF kappaB transcription factor activity	0.548916	0.746784
5S class rRNA transcription	0.729785	0.746784
eye photoreceptor cell development	0.729785	0.746784
negative regulation of calcium dependent cell cell adhesion	0.624745	0.746784
acrosome assembly	0.729785	0.746784
calcium ion transport	0.548916	0.746784
cellular metabolic process	0.729785	0.746784
centriole replication	0.438782	0.746784
cellular response to starvation	0.0723302	0.746784
regulation of T cell activation	0.0723302	0.746784
anterograde axon cargo transport	0.729785	0.746784
GPI anchor biosynthetic process	0.438782	0.746784
microtubule depolymerization	0.729785	0.746784
peptidyl serine phosphorylation	0.624745	0.746784
negative regulation of glial cell differentiation	0.729785	0.746784
regulation of lipopolysaccharide mediated signaling pathway	0.548916	0.746784
replication fork processing	0.729785	0.746784
fatty acid transport	0.729785	0.746784
epithelial to mesenchymal transition	0.0723302	0.746784
negative regulation of multicellular organism growth	0.729785	0.746784
protein targeting to lysosome	0.624745	0.746784
salivary gland cavitation	0.729785	0.746784
generation of neurons	0.548916	0.746784
extracellular matrix organization	0.108788	0.746784
response to carbohydrate stimulus	0.438782	0.746784
keratinocyte activation	0.729785	0.746784
glycosaminoglycan metabolic process	0.729785	0.746784
negative regulation of cell cycle arrest	0.729785	0.746784
sperm motility	0.636731	0.746784
cytokine production	0.488725	0.746784
negative regulation of hormone secretion	0.624745	0.746784
lung lobe morphogenesis	0.729785	0.746784
entrainment of circadian clock	0.204975	0.746784
T cell costimulation	0.548916	0.746784
positive regulation of vascular endothelial growth factor receptor signaling pathway	0.729785	0.746784
enteric nervous system development	0.548916	0.746784
neuron maturation	0.0723302	0.746784
cell projection organization	0.548916	0.746784
mRNA transcription from RNA polymerase II promoter	0.729785	0.746784
rRNA export from nucleus	0.624745	0.746784
lipoprotein metabolic process	0.729785	0.746784
regulation of phosphorylation	0.624745	0.746784
hormonal regulation of the force of heart contraction	0.729785	0.746784
mesoderm development	0.488725	0.746784
positive regulation of type I interferon production	0.729785	0.746784
lipid metabolic process	0.396256	0.746784
positive regulation of chondrocyte differentiation	0.488725	0.746784
regulation of T cell receptor signaling pathway	0.548916	0.746784
negative regulation of Notch signaling pathway	0.729785	0.746784
prostatic bud formation	0.624745	0.746784
positive regulation of tumor necrosis factor biosynthetic process	0.624745	0.746784
negative regulation of peptidyl tyrosine phosphorylation	0.729785	0.746784
short term memory	0.488725	0.746784
seryl tRNA aminoacylation	0.729785	0.746784
negative regulation of blood coagulation	0.729785	0.746784
blood coagulation	0.488725	0.746784
DNA methylation	0.359421	0.746784
histone demethylation	0.729785	0.746784
external genitalia morphogenesis	0.729785	0.746784
positive regulation of macrophage derived foam cell differentiation	0.624745	0.746784
cytoplasmic transport	0.624745	0.746784
negative regulation of G protein coupled receptor protein signaling pathway	0.624745	0.746784
facial nerve structural organization	0.624745	0.746784
surfactant homeostasis	0.729785	0.746784
regulation of microtubule based process	0.624745	0.746784
Ras protein signal transduction	0.729785	0.746784
myeloid cell differentiation	0.396256	0.746784
proton transport	0.50145	0.746784
nucleus organization	0.204975	0.746784
positive regulation of NF kappaB import into nucleus	0.729785	0.746784
oocyte axis specification	0.729785	0.746784
JNK cascade	0.396256	0.746784
positive regulation of I kappaB kinase NF kappaB cascade	0.253272	0.746784
regulation of Ras protein signal transduction	0.438782	0.746784
skeletal muscle tissue development	0.327129	0.746784
social behavior	0.624745	0.746784
diuresis	0.729785	0.746784
macrophage differentiation	0.396256	0.746784
cerebral cortex GABAergic interneuron migration	0.729785	0.746784
negative regulation of T cell differentiation	0.729785	0.746784
metanephros development	0.190665	0.746784
viral reproduction	0.729785	0.746784
plasma membrane repair	0.729785	0.746784
ear morphogenesis	0.624745	0.746784
positive regulation of hormone secretion	0.50145	0.746784
regulation of actin filament length	0.729785	0.746784
leukocyte chemotaxis	0.729785	0.746784
leukocyte tethering or rolling	0.729785	0.746784
multicellular organismal development	0.174511	0.746784
activation of JNKK activity	0.729785	0.746784
response to lipid hydroperoxide	0.729785	0.746784
brain development	0.478951	0.746784
cerebellar cortex morphogenesis	0.624745	0.746784
apoptotic nuclear change	0.729785	0.746784
response to nutrient levels	0.624745	0.746784
negative regulation of membrane potential	0.729785	0.746784
cell cell signaling	0.257687	0.746784
positive regulation of glycolysis	0.624745	0.746784
sex differentiation	0.666032	0.746784
oocyte growth	0.624745	0.746784
positive regulation of leukocyte migration	0.624745	0.746784
lipid storage	0.548916	0.746784
transforming growth factor beta receptor complex assembly	0.624745	0.746784
organ morphogenesis	0.519399	0.746784
chondroitin sulfate proteoglycan biosynthetic process	0.729785	0.746784
vesicle fusion	0.729785	0.746784
positive regulation of MAP kinase activity	0.624745	0.746784
germ cell development	0.548916	0.746784
focal adhesion assembly	0.729785	0.746784
signal complex assembly	0.729785	0.746784
cell cycle checkpoint	0.624745	0.746784
epithelial tube formation	0.729785	0.746784
negative regulation of epithelial cell proliferation	0.422074	0.746784
positive regulation of JUN kinase activity	0.0723302	0.746784
adult heart development	0.0723302	0.746784
osteoblast proliferation	0.729785	0.746784
regulation of short term neuronal synaptic plasticity	0.729785	0.746784
toll like receptor signaling pathway	0.548916	0.746784
positive regulation of peptidyl serine phosphorylation	0.624745	0.746784
regulation of S phase of mitotic cell cycle	0.729785	0.746784
positive regulation of caspase activity	0.729785	0.746784
response to activity	0.729785	0.746784
regulation of transcription from RNA polymerase II promoter	0.302674	0.746784
estrous cycle phase	0.50145	0.746784
positive regulation of T cell proliferation	0.548916	0.746784
positive regulation of cellular protein metabolic process	0.624745	0.746784
spinal cord ventral commissure morphogenesis	0.624745	0.746784
centromeric heterochromatin formation	0.729785	0.746784
anterior posterior axis specification	0.204975	0.746784
regulation of Cdc42 GTPase activity	0.548916	0.746784
negative regulation of ubiquitin protein ligase activity involved in mitotic cell cycle	0.0723302	0.746784
pathogenesis	0.624745	0.746784
regulation of transcription factor activity	0.624745	0.746784
smoothened signaling pathway involved in spinal cord motor neuron cell fate specification	0.488725	0.746784
cell recognition	0.729785	0.746784
negative regulation of receptor mediated endocytosis	0.624745	0.746784
telencephalon development	0.624745	0.746784
B cell costimulation	0.729785	0.746784
pigmentation	0.488725	0.746784
hemidesmosome assembly	0.729785	0.746784
regulation of myeloid cell differentiation	0.729785	0.746784
decidualization	0.204975	0.746784
tRNA transcription from RNA polymerase III promoter	0.729785	0.746784
pharyngeal system development	0.729785	0.746784
binding of sperm to zona pellucida	0.548916	0.746784
defense response to virus	0.624745	0.746784
regulation of transcription from RNA polymerase II promoter in response to oxidative stress	0.729785	0.746784
regulation of pH	0.729785	0.746784
myeloid leukocyte differentiation	0.729785	0.746784
mesodermal cell migration	0.729785	0.746784
bile acid and bile salt transport	0.729785	0.746784
chromosome segregation	0.250313	0.746784
positive regulation of epithelial to mesenchymal transition	0.729785	0.746784
regulation of synaptic transmission glutamatergic	0.729785	0.746784
negative regulation of histone H3 K9 methylation	0.729785	0.746784
endonucleolytic cleavage in 5 prime ETS of tricistronic rRNA transcript (SSU rRNA 5.8S rRNA LSU rRNA)	0.624745	0.746784
endoderm formation	0.729785	0.746784
cardiac cell differentiation	0.729785	0.746784
growth plate cartilage chondrocyte differentiation	0.624745	0.746784
leukocyte activation	0.729785	0.746784
response to molecule of bacterial origin	0.548916	0.746784
DNA synthesis involved in DNA repair	0.729785	0.746784
acrosome reaction	0.624745	0.746784
catecholamine secretion	0.729785	0.746784
embryonic gut morphogenesis	0.488725	0.746784
feeding behavior	0.396256	0.746784
positive regulation of chemokine biosynthetic process	0.729785	0.746784
histone H3 K36 methylation	0.729785	0.746784
response to genistein	0.729785	0.746784
associative learning	0.729785	0.746784
immunoglobulin secretion	0.488725	0.746784
histone H2A acetylation	0.729785	0.746784
B cell differentiation	0.204975	0.746784
estrogen receptor signaling pathway	0.438782	0.746784
negative regulation of kinase activity	0.624745	0.746784
positive regulation of cAMP mediated signaling	0.729785	0.746784
positive regulation of protein catabolic process	0.488725	0.746784
methylation	0.488725	0.746784
prostaglandin biosynthetic process	0.548916	0.746784
endothelial cell proliferation	0.624745	0.746784
neuropeptide signaling pathway	0.0710707	0.746784
muscle hypertrophy	0.729785	0.746784
G2 phase of mitotic cell cycle	0.488725	0.746784
negative regulation of epidermal growth factor receptor activity	0.729785	0.746784
positive regulation of interleukin 8 biosynthetic process	0.548916	0.746784
inflammatory response	0.211263	0.746784
regulation of actin cytoskeleton organization	0.624745	0.746784
protein export from nucleus	0.624745	0.746784
protein stabilization	0.624745	0.746784
lung alveolus development	0.355151	0.746784
globus pallidus development	0.729785	0.746784
response to interferon gamma	0.548916	0.746784
response to tumor necrosis factor	0.624745	0.746784
homeostasis of number of cells within a tissue	0.488725	0.746784
venous blood vessel morphogenesis	0.729785	0.746784
mammary gland fat development	0.624745	0.746784
cardiolipin metabolic process	0.729785	0.746784
stem cell differentiation	0.624745	0.746784
gut development	0.355151	0.746784
positive regulation of protein kinase activity	0.624745	0.746784
macrophage activation during immune response	0.729785	0.746784
response to stress	0.408204	0.746784
positive regulation of tumor necrosis factor production	0.729785	0.746784
outflow tract morphogenesis	0.624745	0.746784
lymphangiogenesis	0.624745	0.746784
mitochondrial electron transport NADH to ubiquinone	0.624745	0.746784
triglyceride metabolic process	0.729785	0.746784
regulation of meiosis	0.729785	0.746784
circadian rhythm	0.072884	0.746784
regulation of mRNA stability	0.729785	0.746784
myotube cell development	0.729785	0.746784
regulation of circadian rhythm	0.624745	0.746784
peptide hormone secretion	0.729785	0.746784
positive regulation of alpha beta T cell proliferation	0.729785	0.746784
response to X ray	0.548916	0.746784
mast cell activation	0.729785	0.746784
B cell activation	0.488725	0.746784
cellular response to reactive oxygen species	0.624745	0.746784
positive regulation of protein polymerization	0.729785	0.746784
artery smooth muscle contraction	0.624745	0.746784
negative regulation of peptide secretion	0.729785	0.746784
histone deubiquitination	0.488725	0.746784
female somatic sex determination	0.729785	0.746784
miRNA metabolic process	0.548916	0.746784
transcription initiation from RNA polymerase III promoter	0.624745	0.746784
regulation of sodium:hydrogen antiporter activity	0.729785	0.746784
forebrain dorsal ventral pattern formation	0.624745	0.746784
spinal cord oligodendrocyte cell differentiation	0.729785	0.746784
response to chemical stimulus	0.50145	0.746784
proprioception	0.729785	0.746784
mRNA cleavage	0.729785	0.746784
head morphogenesis	0.729785	0.746784
positive regulation of histone deacetylation	0.729785	0.746784
elevation of cytosolic calcium ion concentration	0.548916	0.746784
protein import into nucleus	0.355151	0.746784
parathyroid gland development	0.729785	0.746784
bone development	0.0723302	0.746784
pyrimidine dimer repair	0.729785	0.746784
branching morphogenesis of a tube	0.50145	0.746784
membrane raft organization	0.729785	0.746784
spindle organization	0.548916	0.746784
positive regulation of cortisol secretion	0.729785	0.746784
response to metal ion	0.729785	0.746784
negative regulation of vascular permeability	0.729785	0.746784
DNA replication dependent nucleosome assembly	0.729785	0.746784
regulation of cell differentiation	0.396256	0.746784
pallium development	0.624745	0.746784
neuromuscular process controlling balance	0.548916	0.746784
negative regulation of cell size	0.624745	0.746784
negative regulation of proteasomal ubiquitin dependent protein catabolic process	0.624745	0.746784
response to vitamin D	0.729785	0.746784
sprouting angiogenesis	0.729785	0.746784
cell surface receptor linked signaling pathway	0.237812	0.746784
protein K48 linked deubiquitination	0.729785	0.746784
negative regulation of vasodilation	0.729785	0.746784
transcription coupled nucleotide excision repair	0.729785	0.746784
detection of calcium ion	0.729785	0.746784
photoperiodism	0.729785	0.746784
negative regulation of DNA binding	0.355151	0.746784
cellular response to hydrogen peroxide	0.355151	0.746784
anatomical structure formation involved in morphogenesis	0.126077	0.746784
myotube differentiation	0.729785	0.746784
neurological system process involved in regulation of systemic arterial blood pressure	0.729785	0.746784
cAMP biosynthetic process	0.729785	0.746784
ovulation	0.548916	0.746784
type I interferon mediated signaling pathway	0.729785	0.746784
negative regulation of tumor necrosis factor production	0.488725	0.746784
positive regulation of cytokine secretion	0.729785	0.746784
response to insulin stimulus	0.263397	0.746784
traversing start control point of mitotic cell cycle	0.729785	0.746784
detection of chemical stimulus involved in sensory perception of bitter taste	0.729785	0.746784
negative regulation of stress fiber assembly	0.729785	0.746784
mitochondrial electron transport succinate to ubiquinone	0.729785	0.746784
cell migration in hindbrain	0.729785	0.746784
protein amino acid glycosylation	0.729785	0.746784
protein targeting to membrane	0.624745	0.746784
nuclear export	0.488725	0.746784
toxin metabolic process	0.624745	0.746784
T cell receptor signaling pathway	0.355151	0.746784
regulation of systemic arterial blood pressure by endothelin	0.624745	0.746784
macrophage fusion	0.729785	0.746784
progesterone receptor signaling pathway	0.729785	0.746784
negative regulation of histone methylation	0.729785	0.746784
nucleotide excision repair DNA damage removal	0.729785	0.746784
morphogenesis of an epithelium	0.548916	0.746784
positive regulation of fatty acid biosynthetic process	0.729785	0.746784
response to testosterone stimulus	0.729785	0.746784
axon regeneration	0.729785	0.746784
formation of translation initiation complex	0.729785	0.746784
columnar cuboidal epithelial cell development	0.729785	0.746784
negative regulation of insulin secretion	0.624745	0.746784
secretion of lysosomal enzymes	0.624745	0.746784
synapsis	0.548916	0.746784
granulocyte differentiation	0.204975	0.746784
snRNA export from nucleus	0.729785	0.746784
regulation of JNK cascade	0.729785	0.746784
central nervous system neuron differentiation	0.488725	0.746784
substrate adhesion dependent cell spreading	0.729785	0.746784
positive regulation of calcium ion transport via voltage gated calcium channel activity	0.729785	0.746784
ubiquitin dependent protein catabolic process via the multivesicular body sorting pathway	0.729785	0.746784
mammary duct terminal end bud growth	0.624745	0.746784
regulation of exit from mitosis	0.624745	0.746784
prostate gland stromal morphogenesis	0.0723302	0.746784
branch elongation of an epithelium	0.729785	0.746784
positive regulation of cell substrate adhesion	0.359421	0.746784
growth	0.624745	0.746784
atrioventricular node cell development	0.729785	0.746784
excretion	0.729785	0.746784
prostate epithelial cord arborization involved in prostate glandular acinus morphogenesis	0.548916	0.746784
cytoplasmic sequestering of transcription factor	0.624745	0.746784
negative regulation of phosphorylation	0.327129	0.746784
cellular response to heat	0.729785	0.746784
regulation of cell growth by extracellular stimulus	0.729785	0.746784
positive regulation of transcription factor activity	0.355151	0.746784
transcription from mitochondrial promoter	0.729785	0.746784
regulation of gene expression by genetic imprinting	0.298561	0.746784
protein ubiquitination	0.725096	0.746784
protein localization to chromosome	0.624745	0.746784
epidermal cell differentiation	0.624745	0.746784
positive regulation of cytokinesis	0.729785	0.746784
platelet activation	0.355151	0.746784
protein catabolic process	0.438782	0.746784
negative regulation of JAK STAT cascade	0.729785	0.746784
response to cytokine stimulus	0.341338	0.746784
aging	0.355151	0.746784
immunoglobulin V(D)J recombination	0.729785	0.746784
nucleosome positioning	0.624745	0.746784
RNA capping	0.729785	0.746784
complement activation	0.624745	0.746784
artery morphogenesis	0.636731	0.746784
negative regulation of cell adhesion	0.396256	0.746784
leukocyte adhesive activation	0.729785	0.746784
regulation of cell size	0.729785	0.746784
cardiac muscle tissue development	0.729785	0.746784
embryo implantation	0.396256	0.746784
antigen processing and presentation of endogenous antigen	0.729785	0.746784
positive regulation of receptor mediated endocytosis	0.729785	0.746784
proteolysis	0.438782	0.746784
leukocyte homeostasis	0.0723302	0.746784
cardiac muscle cell proliferation	0.624745	0.746784
electron transport chain	0.438782	0.746784
Arp2 3 complex mediated actin nucleation	0.729785	0.746784
positive regulation of epidermal growth factor receptor signaling pathway	0.126077	0.746784
cerebral cortex neuron differentiation	0.729785	0.746784
astrocyte development	0.729785	0.746784
Peyers patch development	0.729785	0.746784
germ cell migration	0.729785	0.746784
chromatin silencing	0.0723302	0.746784
regulation of epithelial cell differentiation	0.729785	0.746784
histone H2B ubiquitination	0.548916	0.746784
detection of light stimulus involved in visual perception	0.729785	0.746784
production of miRNAs involved in gene silencing by miRNA	0.729785	0.746784
regulation of angiogenesis	0.729785	0.746784
positive regulation of transcription initiation from RNA polymerase II promoter	0.624745	0.746784
ovarian follicle rupture	0.488725	0.746784
complement activation lectin pathway	0.729785	0.746784
protein localization to centrosome	0.729785	0.746784
negative regulation of synaptic transmission	0.488725	0.746784
meiosis	0.103471	0.746784
response to oxidative stress	0.636731	0.746784
positive regulation of metabolic process	0.729785	0.746784
histone mRNA catabolic process	0.729785	0.746784
lymph vessel development	0.624745	0.746784
keratinocyte differentiation	0.396256	0.746784
pro B cell differentiation	0.729785	0.746784
granulosa cell differentiation	0.729785	0.746784
proepicardium development	0.729785	0.746784
mismatch repair	0.396256	0.746784
regulation of protein ubiquitination	0.729785	0.746784
adipose tissue development	0.729785	0.746784
cytokine mediated signaling pathway	0.126077	0.746784
regulation of transcription from RNA polymerase II promoter involved in spinal cord motor neuron fate specification	0.729785	0.746784
positive regulation of telomerase activity	0.729785	0.746784
atrioventricular node cell fate commitment	0.729785	0.746784
activation of Rho GTPase activity	0.624745	0.746784
neuromuscular process	0.624745	0.746784
peristalsis	0.729785	0.746784
regulation of cytokine production	0.548916	0.746784
morphogenesis of an epithelial fold	0.624745	0.746784
positive regulation of cell death	0.624745	0.746784
positive regulation of heart contraction	0.729785	0.746784
regulation of heart contraction	0.50145	0.746784
sensory perception of light stimulus	0.624745	0.746784
response to antibiotic	0.0723302	0.746784
startle response	0.729785	0.746784
tail morphogenesis	0.624745	0.746784
developmental pigmentation	0.204975	0.746784
lipid homeostasis	0.396256	0.746784
rRNA processing	0.179206	0.746784
glucocorticoid metabolic process	0.729785	0.746784
ganglion mother cell fate determination	0.729785	0.746784
forelimb morphogenesis	0.548916	0.746784
muscle organ morphogenesis	0.624745	0.746784
heme biosynthetic process	0.729785	0.746784
cell cycle cytokinesis	0.729785	0.746784
response to cold	0.204975	0.746784
positive regulation of synaptogenesis	0.438782	0.746784
photoreceptor cell morphogenesis	0.729785	0.746784
response to stimulus	0.148522	0.746784
membrane depolarization	0.204975	0.746784
regulated secretory pathway	0.729785	0.746784
negative regulation of plasma lipoprotein oxidation	0.729785	0.746784
interferon gamma mediated signaling pathway	0.729785	0.746784
RNA 3 prime end processing	0.438782	0.746784
cytoskeleton organization	0.716174	0.746784
protein complex localization	0.624745	0.746784
response to biotic stimulus	0.548916	0.746784
cell adhesion	0.668915	0.746784
sarcomere organization	0.204975	0.746784
protein secretion	0.624745	0.746784
positive regulation of transforming growth factor beta3 production	0.729785	0.746784
regulation of embryonic development	0.729785	0.746784
high density lipoprotein particle remodeling	0.729785	0.746784
biomineral formation	0.438782	0.746784
telomere maintenance via telomerase	0.488725	0.746784
embryonic development ending in birth or egg hatching	0.729785	0.746784
mitotic chromosome condensation	0.359421	0.746784
mitotic cell cycle spindle assembly checkpoint	0.438782	0.746784
cholesterol homeostasis	0.729785	0.746784
T cell selection	0.729785	0.746784
elevation of cytosolic calcium ion concentration involved in G protein signaling coupled to IP3 second messenger	0.729785	0.746784
G1 phase of mitotic cell cycle	0.729785	0.746784
ventricular cardiac muscle tissue morphogenesis	0.355151	0.746784
intermediate filament cytoskeleton organization	0.729785	0.746784
positive regulation of Golgi to plasma membrane protein transport	0.729785	0.746784
reverse cholesterol transport	0.624745	0.746784
somatic motor neuron differentiation	0.729785	0.746784
negative regulation of protein kinase B signaling cascade	0.548916	0.746784
pre microRNA processing	0.438782	0.746784
suckling behavior	0.729785	0.746784
depyrimidination	0.729785	0.746784
glycosphingolipid metabolic process	0.729785	0.746784
cellular response to growth factor stimulus	0.204975	0.746784
negative regulation of osteoblast differentiation	0.0723302	0.746784
positive regulation of natural killer cell activation	0.624745	0.746784
learning or memory	0.488725	0.746784
protein kinase C deactivation	0.729785	0.746784
positive regulation of nitric oxide biosynthetic process	0.624745	0.746784
cardiac Purkinje fiber cell differentiation	0.729785	0.746784
embryonic hindlimb morphogenesis	0.548916	0.746784
angiogenesis involved in wound healing	0.204975	0.746784
positive regulation of multicellular organism growth	0.396256	0.746784
negative regulation of axonogenesis	0.548916	0.746784
protein deubiquitination	0.624745	0.746784
nucleosome disassembly	0.204975	0.746784
S adenosylmethioninamine metabolic process	0.729785	0.746784
mRNA processing	0.437366	0.746784
establishment of mitotic spindle localization	0.729785	0.746784
response to interleukin 1	0.204975	0.746784
cellular response to insulin stimulus	0.624745	0.746784
bone mineralization	0.548916	0.746784
eosinophil chemotaxis	0.729785	0.746784
male pronucleus assembly	0.548916	0.746784
osteoblast differentiation	0.0751924	0.746784
notochord regression	0.624745	0.746784
positive regulation of RNA elongation	0.729785	0.746784
isotype switching	0.624745	0.746784
response to estrogen stimulus	0.488725	0.746784
chaperone mediated protein complex assembly	0.438782	0.746784
lysosomal transport	0.729785	0.746784
septum secundum development	0.729785	0.746784
muscle cell homeostasis	0.488725	0.746784
positive regulation of cardiac muscle cell proliferation	0.0723302	0.746784
regulation of smooth muscle cell proliferation	0.624745	0.746784
ovulation from ovarian follicle	0.729785	0.746784
fertilization	0.488725	0.746784
spindle astral microtubule organization	0.624745	0.746784
positive regulation of T cell activation	0.50145	0.746784
positive regulation of smooth muscle cell proliferation	0.204975	0.746784
response to protozoan	0.624745	0.746784
mitochondrial electron transport ubiquinol to cytochrome c	0.729785	0.746784
negative regulation of fibroblast proliferation	0.729785	0.746784
regulation of cell shape	0.177792	0.746784
regulation of chromosome organization	0.729785	0.746784
Type II pneumocyte differentiation	0.729785	0.746784
cellular phosphate ion homeostasis	0.624745	0.746784
bone resorption	0.548916	0.746784
microtubule polymerization	0.548916	0.746784
steroid hormone receptor signaling pathway	0.624745	0.746784
cellular response to extracellular stimulus	0.488725	0.746784
negative regulation of superoxide anion generation	0.729785	0.746784
regulation of mitotic cell cycle	0.624745	0.746784
tRNA aminoacylation for protein translation	0.624745	0.746784
negative regulation of fat cell differentiation	0.729785	0.746784
regulation of attachment of spindle microtubules to kinetochore	0.548916	0.746784
negative regulation of appetite	0.548916	0.746784
positive regulation of axonogenesis	0.729785	0.746784
intermediate filament organization	0.729785	0.746784
neurohypophysis development	0.729785	0.746784
multicellular organism growth	0.327129	0.746784
menstruation	0.729785	0.746784
blastocyst formation	0.729785	0.746784
smoothened signaling pathway involved in dorsal ventral neural tube patterning	0.488725	0.746784
nuclear mRNA cis splicing via spliceosome	0.729785	0.746784
positive regulation of pseudopodium assembly	0.438782	0.746784
cochlea morphogenesis	0.624745	0.746784
synaptic vesicle docking during exocytosis	0.204975	0.746784
regulation of ARF protein signal transduction	0.548916	0.746784
notochord development	0.624745	0.746784
regulation of respiratory gaseous exchange by neurological system process	0.729785	0.746784
hindgut morphogenesis	0.488725	0.746784
positive regulation of mitotic metaphase anaphase transition	0.729785	0.746784
ventricular trabecular myocardium morphogenesis	0.729785	0.746784
nucleoside triphosphate catabolic process	0.729785	0.746784
epidermis development	0.353683	0.746784
lens morphogenesis in camera type eye	0.729785	0.746784
histone exchange	0.624745	0.746784
positive regulation of anti apoptosis	0.729785	0.746784
homeostatic process	0.729785	0.746784
sodium ion transport	0.548916	0.746784
negative regulation of cAMP biosynthetic process	0.624745	0.746784
protein targeting to Golgi	0.438782	0.746784
positive regulation of DNA metabolic process	0.729785	0.746784
positive regulation of inflammatory response	0.729785	0.746784
oncosis	0.729785	0.746784
cellular homeostasis	0.624745	0.746784
striated muscle contraction	0.355151	0.746784
actin cytoskeleton organization	0.533561	0.746784
positive regulation of granule cell precursor proliferation	0.729785	0.746784
face morphogenesis	0.50145	0.746784
ovarian follicle development	0.50145	0.746784
peptidyl lysine trimethylation	0.729785	0.746784
barbed end actin filament capping	0.729785	0.746784
regulation of defense response to virus	0.624745	0.746784
secretion	0.729785	0.746784
DNA replication	0.0889216	0.746784
negative regulation of BMP signaling pathway	0.548916	0.746784
box C D snoRNP assembly	0.729785	0.746784
regulation of calcium ion dependent exocytosis	0.624745	0.746784
ubiquitin dependent protein catabolic process	0.298561	0.746784
negative regulation of cellular component movement	0.729785	0.746784
negative regulation of cell proliferation	0.624573	0.746784
cell cell adhesion	0.341338	0.746784
eye morphogenesis	0.0723302	0.746784
replication fork protection	0.624745	0.746784
postreplication repair	0.488725	0.746784
mitotic centrosome separation	0.729785	0.746784
white fat cell differentiation	0.729785	0.746784
positive regulation of filopodium assembly	0.624745	0.746784
embryonic morphogenesis	0.729785	0.746784
cell aging	0.327129	0.746784
NLS bearing substrate import into nucleus	0.438782	0.746784
morphogenesis of a branching structure	0.438782	0.746784
patterning of blood vessels	0.50145	0.746784
intermediate filament based process	0.729785	0.746784
positive regulation of glial cell differentiation	0.729785	0.746784
protein heterooligomerization	0.359421	0.746784
digestion	0.0723302	0.746784
sister chromatid cohesion	0.488725	0.746784
regulation of catalytic activity	0.729785	0.746784
negative regulation of epidermal growth factor receptor signaling pathway	0.396256	0.746784
B cell receptor signaling pathway	0.548916	0.746784
positive regulation of cholesterol esterification	0.729785	0.746784
DNA damage response signal transduction resulting in induction of apoptosis	0.396256	0.746784
muscle filament sliding	0.729785	0.746784
arm morphogenesis	0.729785	0.746784
parturition	0.488725	0.746784
positive regulation of B cell differentiation	0.548916	0.746784
positive regulation of glycogen biosynthetic process	0.204975	0.746784
adaptive immune response	0.548916	0.746784
anti apoptosis	0.716174	0.746784
gamma tubulin complex localization	0.729785	0.746784
lactation	0.548916	0.746784
histone H4 acetylation	0.729785	0.746784
negative regulation of epithelial cell proliferation involved in prostate gland development	0.548916	0.746784
luteinization	0.729785	0.746784
positive regulation of DNA dependent DNA replication initiation	0.624745	0.746784
negative regulation of MAP kinase activity	0.438782	0.746784
embryonic axis specification	0.624745	0.746784
regulation of cyclin dependent protein kinase activity	0.488725	0.746784
negative regulation of MAPKKK cascade	0.548916	0.746784
senescence	0.729785	0.746784
Golgi vesicle transport	0.729785	0.746784
negative regulation of viral transcription	0.729785	0.746784
negative thymic T cell selection	0.548916	0.746784
contact inhibition	0.624745	0.746784
regulation of timing of neuron differentiation	0.624745	0.746784
regulation of sensory perception of pain	0.548916	0.746784
protein processing	0.624745	0.746784
meiotic prophase I	0.548916	0.746784
oxygen and reactive oxygen species metabolic process	0.624745	0.746784
negative regulation of myoblast differentiation	0.0723302	0.746784
protein complex assembly	0.32279	0.746784
regulation of smooth muscle contraction	0.548916	0.746784
positive regulation of DNA repair	0.396256	0.746784
cell redox homeostasis	0.624745	0.746784
regulation of cell morphogenesis	0.729785	0.746784
synapse assembly	0.548916	0.746784
positive regulation of bone resorption	0.624745	0.746784
defense response to bacterium	0.438782	0.746784
regulation of cell projection organization	0.624745	0.746784
negative regulation of telomerase activity	0.729785	0.746784
double strand break repair	0.250313	0.746784
phosphoinositide 3 kinase cascade	0.438782	0.746784
trophoblast giant cell differentiation	0.624745	0.746784
auditory receptor cell stereocilium organization	0.729785	0.746784
negative regulation of protein ubiquitination	0.624745	0.746784
positive regulation of auditory receptor cell differentiation	0.729785	0.746784
mRNA splice site selection	0.548916	0.746784
exocytosis	0.422074	0.746784
axon extension involved in development	0.729785	0.746784
chromosome organization	0.273111	0.746784
regulation of gene expression epigenetic	0.729785	0.746784
retrograde transport vesicle recycling within Golgi	0.729785	0.746784
response to corticosteroid stimulus	0.355151	0.746784
ureteric bud development	0.072884	0.746784
enamel mineralization	0.729785	0.746784
positive regulation of cAMP biosynthetic process	0.548916	0.746784
positive regulation of gene expression	0.190665	0.746784
hindbrain development	0.50145	0.746784
somatic hypermutation of immunoglobulin genes	0.624745	0.746784
regulation of RNA polymerase II transcriptional preinitiation complex assembly	0.729785	0.746784
intracellular mRNA localization	0.624745	0.746784
bone remodeling	0.624745	0.746784
retinal cone cell development	0.729785	0.746784
negative regulation of telomere maintenance via semi conservative replication	0.729785	0.746784
positive regulation of germinal center formation	0.729785	0.746784
mitochondrial respiratory chain complex assembly	0.729785	0.746784
telomere maintenance via telomere lengthening	0.729785	0.746784
auditory receptor cell fate specification	0.729785	0.746784
nerve growth factor receptor signaling pathway	0.624745	0.746784
regulation of small GTPase mediated signal transduction	0.488725	0.746784
SMAD protein complex assembly	0.624745	0.746784
positive regulation of interferon alpha production	0.729785	0.746784
negative regulation of dendrite morphogenesis	0.729785	0.746784
lung vasculature development	0.624745	0.746784
cAMP metabolic process	0.729785	0.746784
regulation of blood pressure	0.422074	0.746784
nucleotide excision repair	0.359421	0.746784
protein localization in nucleus	0.729785	0.746784
lymph node development	0.624745	0.746784
positive regulation of cardioblast differentiation	0.729785	0.746784
fibrinolysis	0.729785	0.746784
negative regulation of DNA replication	0.488725	0.746784
synaptic vesicle exocytosis	0.0723302	0.746784
regulation of endocytosis	0.250313	0.746784
gastric acid secretion	0.729785	0.746784
cGMP biosynthetic process	0.204975	0.746784
positive regulation of interleukin 6 production	0.204975	0.746784
negative regulation of DNA endoreduplication	0.729785	0.746784
activation of NF kappaB inducing kinase activity	0.0723302	0.746784
parallel actin filament bundle assembly	0.729785	0.746784
regulation of erythrocyte differentiation	0.729785	0.746784
retina homeostasis	0.729785	0.746784
anatomical structure development	0.488725	0.746784
somite specification	0.624745	0.746784
branching involved in ureteric bud morphogenesis	0.50145	0.746784
vasoconstriction	0.624745	0.746784
negative regulation of protein binding	0.488725	0.746784
mammary gland epithelial cell proliferation	0.729785	0.746784
autophagy	0.488725	0.746784
DNA recombination	0.165305	0.746784
negative regulation of S phase of mitotic cell cycle	0.729785	0.746784
negative regulation of behavior	0.729785	0.746784
cell matrix adhesion	0.108788	0.746784
regulation of multicellular organism growth	0.438782	0.746784
negative regulation of endocytosis	0.488725	0.746784
attachment of spindle microtubules to kinetochore	0.729785	0.746784
cellular sodium ion homeostasis	0.729785	0.746784
COPI coating of Golgi vesicle	0.729785	0.746784
eating behavior	0.359421	0.746784
vascular endothelial growth factor receptor signaling pathway	0.624745	0.746784
regulation of mRNA export from nucleus	0.729785	0.746784
memory	0.729785	0.746784
calcium ion homeostasis	0.729785	0.746784
positive regulation of mononuclear cell proliferation	0.624745	0.746784
labyrinthine layer morphogenesis	0.729785	0.746784
tertiary branching involved in mammary gland duct morphogenesis	0.624745	0.746784
female meiosis	0.624745	0.746784
ventricular cardiac muscle cell development	0.729785	0.746784
positive regulation of mammary gland epithelial cell proliferation	0.729785	0.746784
spinal cord motor neuron differentiation	0.729785	0.746784
positive regulation of B cell activation	0.729785	0.746784
mRNA catabolic process	0.729785	0.746784
positive regulation of epithelial cell proliferation	0.204975	0.746784
myoblast proliferation	0.729785	0.746784
positive regulation of hormone biosynthetic process	0.729785	0.746784
ER to Golgi vesicle mediated transport	0.729785	0.746784
actin polymerization dependent cell motility	0.729785	0.746784
histone modification	0.729785	0.746784
Leydig cell differentiation	0.729785	0.746784
activation of MAPKK activity	0.355151	0.746784
regulation of axon extension	0.729785	0.746784
response to superoxide	0.729785	0.746784
transcription	0.103471	0.746784
organ formation	0.624745	0.746784
regulation of actin filament polymerization	0.729785	0.746784
positive regulation of endothelial cell migration	0.729785	0.746784
S phase of mitotic cell cycle	0.729785	0.746784
positive regulation of NF kappaB transcription factor activity	0.298561	0.746784
middle ear morphogenesis	0.190665	0.746784
oligodendrocyte development	0.624745	0.746784
progesterone biosynthetic process	0.729785	0.746784
negative regulation of actin filament depolymerization	0.624745	0.746784
inactivation of MAPK activity	0.729785	0.746784
response to pH	0.729785	0.746784
wound healing	0.126077	0.746784
negative regulation of telomere maintenance via telomerase	0.624745	0.746784
regulation of neurogenesis	0.548916	0.746784
transcription initiation from RNA polymerase II promoter	0.412407	0.746784
keratinocyte proliferation	0.729785	0.746784
carbohydrate metabolic process	0.273111	0.746784
gland morphogenesis	0.624745	0.746784
positive regulation of thymocyte apoptosis	0.729785	0.746784
negative regulation of histone acetylation	0.729785	0.746784
post embryonic hindlimb morphogenesis	0.624745	0.746784
cell fate determination	0.624745	0.746784
hydrogen peroxide catabolic process	0.729785	0.746784
very low density lipoprotein particle remodeling	0.729785	0.746784
body fluid secretion	0.729785	0.746784
T cell cytokine production	0.729785	0.746784
positive regulation of mast cell degranulation	0.729785	0.746784
healing during inflammatory response	0.729785	0.746784
positive regulation of osteoclast differentiation	0.548916	0.746784
regulation of neuron differentiation	0.548916	0.746784
regulation of dendrite development	0.729785	0.746784
negative regulation of neuron apoptosis	0.263397	0.746784
positive regulation of transcription of Notch receptor target	0.729785	0.746784
respiratory gaseous exchange	0.488725	0.746784
response to UV	0.624745	0.746784
negative regulation of binding	0.729785	0.746784
regulation of hydrogen peroxide metabolic process	0.729785	0.746784
positive regulation of insulin receptor signaling pathway	0.359421	0.746784
hard palate development	0.624745	0.746784
establishment of melanosome localization	0.729785	0.746784
embryonic organ morphogenesis	0.0723302	0.746784
parasympathetic nervous system development	0.729785	0.746784
retina morphogenesis in camera type eye	0.204975	0.746784
endocrine pancreas development	0.355151	0.746784
heart looping	0.355151	0.746784
response to type I interferon	0.729785	0.746784
protein destabilization	0.624745	0.746784
reduction of food intake in response to dietary excess	0.729785	0.746784
atrial cardiac muscle cell development	0.729785	0.746784
negative regulation of transforming growth factor beta receptor signaling pathway	0.624745	0.746784
response to ionizing radiation	0.666032	0.746784
spongiotrophoblast layer development	0.729785	0.746784
heart trabecula formation	0.729785	0.746784
ATP synthesis coupled proton transport	0.729785	0.746784
protein kinase B signaling cascade	0.729785	0.746784
heart morphogenesis	0.190665	0.746784
induction of apoptosis by hormones	0.204975	0.746784
retrograde transport endosome to Golgi	0.488725	0.746784
GTP biosynthetic process	0.729785	0.746784
regulation of mitochondrial membrane permeability	0.729785	0.746784
neural tube development	0.396256	0.746784
tongue morphogenesis	0.729785	0.746784
endothelial cell fate specification	0.729785	0.746784
cell communication	0.666032	0.746784
neurogenesis	0.204975	0.746784
negative regulation of B cell proliferation	0.729785	0.746784
auditory receptor cell differentiation	0.548916	0.746784
chylomicron assembly	0.729785	0.746784
response to radiation	0.204975	0.746784
negative regulation of protein catabolic process	0.729785	0.746784
positive regulation of fibroblast growth factor receptor signaling pathway	0.624745	0.746784
positive regulation of T cell anergy	0.729785	0.746784
formation of translation preinitiation complex	0.729785	0.746784
growth plate cartilage chondrocyte proliferation	0.624745	0.746784
positive regulation of cell migration	0.666032	0.746784
gland development	0.729785	0.746784
dorsal ventral neural tube patterning	0.624745	0.746784
regulation of axon diameter	0.729785	0.746784
protein ubiquitination during ubiquitin dependent protein catabolic process	0.729785	0.746784
vagina development	0.624745	0.746784
CTP biosynthetic process	0.729785	0.746784
embryonic arm morphogenesis	0.729785	0.746784
positive regulation of mucus secretion	0.488725	0.746784
response to protein stimulus	0.396256	0.746784
tight junction assembly	0.548916	0.746784
midbrain hindbrain boundary morphogenesis	0.729785	0.746784
ovulation cycle	0.624745	0.746784
single fertilization	0.488725	0.746784
histone H4 R3 methylation	0.729785	0.746784
cell wall macromolecule catabolic process	0.729785	0.746784
positive regulation of amyloid precursor protein biosynthetic process	0.729785	0.746784
pulmonary myocardium development	0.729785	0.746784
DNA unwinding involved in replication	0.729785	0.746784
penetration of zona pellucida	0.624745	0.746784
heart development	0.538689	0.746784
cellular calcium ion homeostasis	0.548916	0.746784
positive regulation of blood vessel endothelial cell migration	0.729785	0.746784
ribonucleoprotein complex biogenesis	0.729785	0.746784
developmental growth	0.327129	0.746784
positive regulation of cell adhesion	0.50145	0.746784
ER overload response	0.729785	0.746784
ventral spinal cord development	0.624745	0.746784
ventricular cardiac myofibril development	0.729785	0.746784
mitotic spindle elongation	0.729785	0.746784
embryonic viscerocranium morphogenesis	0.624745	0.746784
oogenesis	0.548916	0.746784
MAPKKK cascade	0.50145	0.746784
spermatogenesis	0.0596485	0.746784
androgen receptor signaling pathway	0.725096	0.746784
sympathetic nervous system development	0.729785	0.746784
mitosis	0.605969	0.746784
negative regulation of gene specific transcription	0.488725	0.746784
negative regulation of protein tyrosine kinase activity	0.729785	0.746784
bile acid biosynthetic process	0.729785	0.746784
Golgi to plasma membrane protein transport	0.438782	0.746784
nuclear transcribed mRNA catabolic process nonsense mediated decay	0.298561	0.746784
mitochondrial ATP synthesis coupled proton transport	0.729785	0.746784
labyrinthine layer blood vessel development	0.488725	0.746784
dendrite development	0.548916	0.746784
histone phosphorylation	0.548916	0.746784
cell cycle	0.343543	0.746784
luteolysis	0.729785	0.746784
single strand break repair	0.0723302	0.746784
negative regulation of DNA recombination	0.624745	0.746784
negative regulation of somatostatin secretion	0.729785	0.746784
histone deacetylation	0.729785	0.746784
alpha beta T cell differentiation	0.729785	0.746784
response to organic cyclic substance	0.50145	0.746784
ion homeostasis	0.729785	0.746784
olfactory bulb development	0.0723302	0.746784
reciprocal meiotic recombination	0.438782	0.746784
positive regulation of heart rate	0.624745	0.746784
mesenchymal cell differentiation	0.729785	0.746784
vesicle docking during exocytosis	0.438782	0.746784
cardiac muscle cell development	0.729785	0.746784
regulation of exocytosis	0.729785	0.746784
phosphatidylcholine metabolic process	0.624745	0.746784
regulation of cholesterol transport	0.729785	0.746784
receptor mediated endocytosis	0.438782	0.746784
snRNA processing	0.488725	0.746784
positive regulation of angiogenesis	0.355151	0.746784
cation transport	0.624745	0.746784
branching involved in prostate gland morphogenesis	0.624745	0.746784
ribosomal small subunit biogenesis	0.624745	0.746784
DNA fragmentation involved in apoptotic nuclear change	0.548916	0.746784
platelet dense granule organization	0.624745	0.746784
positive regulation of vasoconstriction	0.729785	0.746784
ribonucleoprotein complex import into nucleus	0.729785	0.746784
mRNA stabilization	0.729785	0.746784
centromere complex assembly	0.729785	0.746784
neutrophil differentiation	0.729785	0.746784
negative regulation of myotube differentiation	0.729785	0.746784
microtubule anchoring	0.548916	0.746784
receptor guanylyl cyclase signaling pathway	0.204975	0.746784
endothelial cell migration	0.624745	0.746784
positive regulation of telomere maintenance	0.729785	0.746784
inositol metabolic process	0.729785	0.746784
deadenylation independent decapping of nuclear transcribed mRNA	0.624745	0.746784
neuron development	0.396256	0.746784
negative regulation of TOR signaling pathway	0.624745	0.746784
negative regulation of translation	0.355151	0.746784
cellular response to X ray	0.729785	0.746784
peripheral nervous system development	0.729785	0.746784
sister chromatid segregation	0.729785	0.746784
negative regulation of plasma membrane long chain fatty acid transport	0.729785	0.746784
dolichol metabolic process	0.488725	0.746784
activation of Rap GTPase activity	0.729785	0.746784
fatty acid metabolic process	0.729785	0.746784
neurotransmitter secretion	0.355151	0.746784
negative regulation of protein amino acid ADP ribosylation	0.729785	0.746784
antigen processing and presentation	0.488725	0.746784
positive regulation of estrogen receptor signaling pathway	0.204975	0.746784
Golgi organization	0.396256	0.746784
cholesterol catabolic process	0.729785	0.746784
DNA methylation on cytosine within a CG sequence	0.729785	0.746784
lymphocyte chemotaxis	0.548916	0.746784
establishment or maintenance of cell polarity	0.273111	0.746784
DNA double strand break processing involved in repair via single strand annealing	0.729785	0.746784
negative regulation of myeloid cell differentiation	0.729785	0.746784
positive regulation of phosphoinositide 3 kinase activity	0.729785	0.746784
interleukin 2 biosynthetic process	0.729785	0.746784
regulation of cytokinesis	0.488725	0.746784
autophagic vacuole assembly	0.548916	0.746784
response to glucocorticoid stimulus	0.488725	0.746784
cognition	0.729785	0.746784
olfactory bulb interneuron development	0.729785	0.746784
glucose transport	0.548916	0.746784
negative regulation of transcription factor activity	0.355151	0.746784
positive regulation of cyclin dependent protein kinase activity	0.624745	0.746784
nitric oxide transport	0.729785	0.746784
protein lipoylation	0.729785	0.746784
macrophage activation	0.729785	0.746784
myelination	0.327129	0.746784
natriuresis	0.729785	0.746784
ciliary or flagellar motility	0.729785	0.746784
positive regulation of interferon beta biosynthetic process	0.729785	0.746784
paraxial mesoderm formation	0.548916	0.746784
forebrain ventricular zone progenitor cell division	0.729785	0.746784
positive regulation of insulin like growth factor receptor signaling pathway	0.624745	0.746784
organelle organization	0.729785	0.746784
integrin mediated signaling pathway	0.204975	0.746784
positive regulation of alpha beta T cell differentiation	0.548916	0.746784
floor plate formation	0.624745	0.746784
myeloid dendritic cell differentiation	0.729785	0.746784
ATP dependent chromatin remodeling	0.624745	0.746784
regulation of keratinocyte differentiation	0.624745	0.746784
skeletal muscle tissue regeneration	0.729785	0.746784
monoubiquitinated histone H2A deubiquitination	0.729785	0.746784
histone ubiquitination	0.204975	0.746784
positive regulation of macrophage differentiation	0.624745	0.746784
S M checkpoint	0.729785	0.746784
positive regulation of oligodendrocyte differentiation	0.488725	0.746784
actomyosin structure organization	0.548916	0.746784
positive regulation of Wnt receptor signaling pathway	0.729785	0.746784
positive regulation of ATPase activity	0.729785	0.746784
neuromuscular process controlling posture	0.624745	0.746784
nerve development	0.624745	0.746784
response to hormone stimulus	0.438782	0.746784
poly(A)+ mRNA export from nucleus	0.548916	0.746784
inositol phosphate mediated signaling	0.624745	0.746784
BMP signaling pathway	0.548916	0.746784
positive regulation of neuron projection development	0.488725	0.746784
proprioception involved in equilibrioception	0.729785	0.746784
nucleotide excision repair DNA gap filling	0.729785	0.746784
retina development in camera type eye	0.488725	0.746784
negative regulation of negative chemotaxis	0.729785	0.746784
protein modification process	0.229796	0.746784
positive regulation of histone H3 K4 methylation	0.729785	0.746784
regulation of nitrogen compound metabolic process	0.548916	0.746784
positive regulation of triglyceride catabolic process	0.729785	0.746784
positive regulation of cardiac muscle hypertrophy	0.729785	0.746784
protein amino acid phosphorylation	0.150269	0.746784
positive regulation of smooth muscle contraction	0.438782	0.746784
cerebral cortex radially oriented cell migration	0.729785	0.746784
macrophage chemotaxis	0.548916	0.746784
positive regulation of the force of heart contraction by chemical signal	0.729785	0.746784
cytoplasmic mRNA processing body assembly	0.729785	0.746784
branching involved in embryonic placenta morphogenesis	0.729785	0.746784
positive regulation of odontogenesis of dentine containing tooth	0.624745	0.746784
labyrinthine layer development	0.0723302	0.746784
imaginal disc pattern formation	0.729785	0.746784
amyloid precursor protein metabolic process	0.729785	0.746784
histone H4 K16 acetylation	0.729785	0.746784
positive regulation of blood pressure	0.729785	0.746784
positive regulation of cell cycle	0.355151	0.746784
phototransduction visible light	0.729785	0.746784
embryonic eye morphogenesis	0.624745	0.746784
negative regulation of nucleotide metabolic process	0.548916	0.746784
spindle assembly involved in female meiosis I	0.729785	0.746784
phospholipid efflux	0.729785	0.746784
smoothened signaling pathway	0.396256	0.746784
cortical actin cytoskeleton organization	0.624745	0.746784
auditory receptor cell fate determination	0.624745	0.746784
positive regulation of hepatocyte differentiation	0.729785	0.746784
positive regulation of neutrophil apoptosis	0.729785	0.746784
response to inorganic substance	0.50145	0.746784
miRNA catabolic process	0.438782	0.746784
Sertoli cell development	0.0723302	0.746784
regulation of respiratory gaseous exchange	0.729785	0.746784
inner cell mass cell proliferation	0.729785	0.746784
positive regulation of Cdc42 GTPase activity	0.729785	0.746784
symbiosis encompassing mutualism through parasitism	0.548916	0.746784
apoptosis involved in heart morphogenesis	0.729785	0.746784
RNA splicing	0.466449	0.746784
blood vessel maturation	0.729785	0.746784
lymphocyte activation	0.729785	0.746784
fibroblast growth factor receptor signaling pathway	0.548916	0.746784
negative regulation of B cell apoptosis	0.729785	0.746784
regulation of RNA splicing	0.624745	0.746784
cellular biogenic amine metabolic process	0.729785	0.746784
cholesterol efflux	0.729785	0.746784
cardiac ventricle formation	0.729785	0.746784
prostate gland growth	0.624745	0.746784
response to acid	0.0723302	0.746784
post embryonic gut morphogenesis	0.729785	0.746784
RNA methylation	0.729785	0.746784
male sex differentiation	0.729785	0.746784
negative regulation of cyclin dependent protein kinase activity	0.396256	0.746784
regulation of branching involved in prostate gland morphogenesis	0.729785	0.746784
pancreas development	0.488725	0.746784
positive regulation of glucose metabolic process	0.624745	0.746784
egg activation	0.548916	0.746784
response to unfolded protein	0.624745	0.746784
interkinetic nuclear migration	0.548916	0.746784
cellular membrane organization	0.488725	0.746784
positive regulation of defense response to virus by host	0.729785	0.746784
chromatin modification	0.482635	0.746784
ATP metabolic process	0.359421	0.746784
response to wounding	0.072884	0.746784
ventricular septum development	0.729785	0.746784
response to corticosterone stimulus	0.624745	0.746784
mitotic chromosome movement towards spindle pole	0.729785	0.746784
hippocampus development	0.355151	0.746784
snRNA transcription	0.729785	0.746784
transcription from RNA polymerase III promoter	0.729785	0.746784
negative regulation of centriole replication	0.548916	0.746784
T cell mediated immunity	0.729785	0.746784
intestinal absorption	0.729785	0.746784
uterus development	0.729785	0.746784
regulation of Rab GTPase activity	0.624745	0.746784
positive regulation of survival gene product expression	0.548916	0.746784
grooming behavior	0.0723302	0.746784
negative regulation of Ras protein signal transduction	0.438782	0.746784
regulation of macrophage derived foam cell differentiation	0.624745	0.746784
DNA dependent DNA replication	0.438782	0.746784
transcription from RNA polymerase II promoter	0.217855	0.746784
transmembrane receptor protein serine threonine kinase signaling pathway	0.624745	0.746784
humoral immune response	0.396256	0.746784
embryonic heart tube development	0.50145	0.746784
neuron fate commitment	0.190665	0.746784
locus ceruleus development	0.729785	0.746784
DNA integration	0.729785	0.746784
positive regulation of epithelial cell differentiation	0.355151	0.746784
visual learning	0.438782	0.746784
receptor internalization	0.624745	0.746784
nucleotide metabolic process	0.624745	0.746784
oculomotor nerve development	0.729785	0.746784
negative regulation of transcription by glucose	0.729785	0.746784
regulation of smoothened signaling pathway	0.624745	0.746784
centrosome duplication	0.438782	0.746784
interphase of mitotic cell cycle	0.729785	0.746784
protein transport	0.147597	0.746784
positive regulation of MAPKKK cascade	0.263397	0.746784
lung epithelium development	0.729785	0.746784
positive regulation of glucose transport	0.729785	0.746784
induction of positive chemotaxis	0.729785	0.746784
G0 to G1 transition	0.729785	0.746784
negative regulation of blood pressure	0.729785	0.746784
negative regulation of adenylate cyclase activity	0.729785	0.746784
activation of adenylate cyclase activity by G protein signaling pathway	0.624745	0.746784
retinal ganglion cell axon guidance	0.0723302	0.746784
anterior posterior pattern formation	0.390463	0.746784
centrosome organization	0.548916	0.746784
axon choice point recognition	0.729785	0.746784
protein import into nucleus translocation	0.729785	0.746784
specification of segmental identity maxillary segment	0.624745	0.746784
telomere maintenance	0.548916	0.746784
reproductive structure development	0.488725	0.746784
mucosal associated lymphoid tissue development	0.729785	0.746784
regulation of osteoblast differentiation	0.396256	0.746784
neural tube closure	0.250313	0.746784
protein localization	0.412407	0.746784
negative regulation of microtubule depolymerization	0.130392	0.746784
rRNA transcription	0.624745	0.746784
negative regulation of ERK1 and ERK2 cascade	0.729785	0.746784
drinking behavior	0.729785	0.746784
regulation of hormone biosynthetic process	0.729785	0.746784
positive regulation of fat cell differentiation	0.729785	0.746784
multicellular organismal lipid catabolic process	0.729785	0.746784
biological process	0.523889	0.746784
base excision repair	0.624745	0.746784
ventral midline development	0.624745	0.746784
neural crest cell migration	0.624745	0.746784
neuron apoptosis	0.729785	0.746784
mammary gland branching involved in pregnancy	0.729785	0.746784
uterus morphogenesis	0.729785	0.746784
DNA packaging	0.50145	0.746784
regulation of phosphoprotein phosphatase activity	0.624745	0.746784
positive regulation of protein binding	0.624745	0.746784
cell proliferation in forebrain	0.624745	0.746784
cytokine secretion	0.729785	0.746784
nuclear envelope reassembly	0.729785	0.746784
positive regulation of osteoblast differentiation	0.355151	0.746784
regulation of transcription from RNA polymerase III promoter	0.488725	0.746784
centromeric core chromatin assembly	0.729785	0.746784
microtubule nucleation	0.729785	0.746784
positive regulation of fibroblast proliferation	0.624745	0.746784
positive regulation of protein amino acid phosphorylation	0.729785	0.746784
regulation of transcription from RNA polymerase II promoter by glucose	0.729785	0.746784
prostate gland epithelium morphogenesis	0.355151	0.746784
regulation of microvillus assembly	0.729785	0.746784
negative regulation of Rho protein signal transduction	0.729785	0.746784
microtubule based movement	0.120647	0.746784
mRNA polyadenylation	0.729785	0.746784
protein FAD linkage	0.729785	0.746784
plasma cell differentiation	0.729785	0.746784
regulation of protein stability	0.488725	0.746784
regulation of apoptosis	0.220569	0.746784
epithelial cell differentiation involved in prostate gland development	0.729785	0.746784
regulation of smooth muscle cell differentiation	0.624745	0.746784
lymphoid progenitor cell differentiation	0.729785	0.746784
protein amino acid dephosphorylation	0.519399	0.746784
negative regulation of neurogenesis	0.729785	0.746784
negative regulation of programmed cell death	0.438782	0.746784
transmembrane receptor protein tyrosine kinase signaling pathway	0.072884	0.746784
protein maturation by peptide bond cleavage	0.729785	0.746784
peptidyl threonine phosphorylation	0.624745	0.746784
regulation of feeding behavior	0.729785	0.746784
positive regulation of ubiquitin protein ligase activity involved in mitotic cell cycle	0.0723302	0.746784
cell migration	0.359421	0.746784
clathrin coat assembly	0.488725	0.746784
positive regulation of fatty acid beta oxidation	0.624745	0.746784
male meiosis	0.488725	0.746784
steroid biosynthetic process	0.204975	0.746784
regulation of Wnt receptor signaling pathway through beta catenin	0.729785	0.746784
ossification	0.107521	0.746784
response to DNA damage stimulus	0.0984646	0.746784
organ development	0.438782	0.746784
neuron projection morphogenesis	0.729785	0.746784
gene silencing	0.548916	0.746784
positive regulation of cell size	0.624745	0.746784
thyroid hormone generation	0.624745	0.746784
humoral immune response mediated by circulating immunoglobulin	0.624745	0.746784
glomerular basement membrane development	0.729785	0.746784
embryonic cranial skeleton morphogenesis	0.072884	0.746784
positive regulation of tooth mineralization	0.729785	0.746784
spinal cord dorsal ventral patterning	0.488725	0.746784
positive regulation of prostaglandin endoperoxidase synthase activity	0.624745	0.746784
negative regulation of mitotic recombination	0.729785	0.746784
response to UV C	0.729785	0.746784
copulation	0.729785	0.746784
trochlear nerve development	0.729785	0.746784
positive regulation of myoblast differentiation	0.624745	0.746784
cellular response to organic cyclic substance	0.729785	0.746784
odontogenesis of dentine containing tooth	0.193703	0.746784
motor axon guidance	0.624745	0.746784
inner ear receptor stereocilium organization	0.729785	0.746784
positive regulation of meiosis	0.624745	0.746784
negative regulation of cell migration	0.355151	0.746784
positive regulation of protein tyrosine kinase activity	0.729785	0.746784
positive regulation of steroid hormone receptor signaling pathway	0.729785	0.746784
negative regulation of astrocyte differentiation	0.729785	0.746784
peripheral nervous system neuron differentiation	0.729785	0.746784
mammary gland specification	0.729785	0.746784
negative regulation of T helper 1 cell differentiation	0.624745	0.746784
regulation of Wnt receptor signaling pathway	0.488725	0.746784
chromatin assembly or disassembly	0.250313	0.746784
cell maturation	0.624745	0.746784
odontogenesis	0.50145	0.746784
camera type eye morphogenesis	0.072884	0.746784
gastrulation with mouth forming second	0.355151	0.746784
androgen metabolic process	0.729785	0.746784
negative regulation of cell division	0.729785	0.746784
positive regulation of protein complex assembly	0.729785	0.746784
small GTPase mediated signal transduction	0.229796	0.746784
regulation of dendrite morphogenesis	0.624745	0.746784
regulation of immune response	0.548916	0.746784
response to amino acid stimulus	0.0723302	0.746784
positive regulation of protein amino acid autophosphorylation	0.729785	0.746784
rRNA catabolic process	0.729785	0.746784
eye pigment granule organization	0.729785	0.746784
positive regulation of interferon beta production	0.729785	0.746784
rRNA metabolic process	0.729785	0.746784
positive regulation of endocytosis	0.624745	0.746784
endonucleolytic cleavage to generate mature 5 prime end of SSU rRNA from (SSU rRNA 5.8S rRNA LSU rRNA)	0.624745	0.746784
release of cytoplasmic sequestered NF kappaB	0.729785	0.746784
cell morphogenesis involved in neuron differentiation	0.729785	0.746784
morphogenesis of embryonic epithelium	0.729785	0.746784
activation of protein kinase activity	0.396256	0.746784
microtubule cytoskeleton organization	0.50145	0.746784
negative regulation of T cell receptor signaling pathway	0.548916	0.746784
negative regulation of chondrocyte differentiation	0.204975	0.746784
glucocorticoid receptor signaling pathway	0.548916	0.746784
activation of caspase activity	0.359421	0.746784
induction of apoptosis via death domain receptors	0.548916	0.746784
positive regulation of lipoprotein lipase activity	0.729785	0.746784
regulation of binding	0.729785	0.746784
negative regulation of vasoconstriction	0.729785	0.746784
response to progesterone stimulus	0.729785	0.746784
axis specification	0.488725	0.746784
RNA catabolic process	0.729785	0.746784
FasL biosynthetic process	0.729785	0.746784
apoptosis	0.285815	0.746784
osteoclast differentiation	0.548916	0.746784
water homeostasis	0.624745	0.746784
translational attenuation	0.729785	0.746784
outer ear morphogenesis	0.729785	0.746784
endothelial cell morphogenesis	0.729785	0.746784
male genitalia morphogenesis	0.624745	0.746784
negative regulation of mitotic cell cycle	0.548916	0.746784
methylation dependent chromatin silencing	0.729785	0.746784
embryonic hemopoiesis	0.636731	0.746784
positive regulation of transcription from RNA polymerase II promoter mitotic	0.729785	0.746784
cellular response to nutrient levels	0.729785	0.746784
ventricular system development	0.729785	0.746784
nucleocytoplasmic transport	0.624745	0.746784
response to selenium ion	0.729785	0.746784
M phase of mitotic cell cycle	0.548916	0.746784
spermatid differentiation	0.729785	0.746784
regulation of mammary gland epithelial cell proliferation	0.729785	0.746784
response to organic substance	0.355151	0.746784
Rho protein signal transduction	0.50145	0.746784
chromosome condensation	0.0723302	0.746784
positive regulation of heart rate by epinephrine	0.729785	0.746784
negative regulation of insulin like growth factor receptor signaling pathway	0.438782	0.746784
negative regulation of fatty acid biosynthetic process	0.548916	0.746784
chaperone mediated protein folding requiring cofactor	0.729785	0.746784
positive regulation of isotype switching to IgA isotypes	0.729785	0.746784
response to hypoxia	0.503715	0.746784
regulation of histone H3 K4 methylation	0.729785	0.746784
paraxial mesoderm development	0.729785	0.746784
triglyceride homeostasis	0.729785	0.746784
cAMP mediated signaling	0.624745	0.746784
smooth muscle cell differentiation	0.729785	0.746784
regulation of cell proliferation	0.664413	0.746784
mitotic recombination	0.729785	0.746784
long term synaptic potentiation	0.624745	0.746784
response to drug	0.0866127	0.746784
regulation of bone mineralization	0.729785	0.746784
positive regulation of synaptic transmission	0.624745	0.746784
positive regulation of peptidyl tyrosine phosphorylation	0.273111	0.746784
embryonic olfactory bulb interneuron precursor migration	0.729785	0.746784
leukocyte migration	0.438782	0.746784
ectoderm development	0.548916	0.746784
gall bladder development	0.729785	0.746784
regulation of membrane potential	0.548916	0.746784
positive regulation of mitotic cell cycle	0.204975	0.746784
regulation of cell growth	0.273111	0.746784
G1 S transition of mitotic cell cycle	0.359421	0.746784
positive regulation of phosphoinositide 3 kinase cascade	0.729785	0.746784
cellular glucose homeostasis	0.729785	0.746784
positive regulation of cytokine mediated signaling pathway	0.729785	0.746784
gastrulation	0.548916	0.746784
cellular respiration	0.729785	0.746784
induction of apoptosis by intracellular signals	0.729785	0.746784
signal transduction	0.7465	0.763475
determination of left right symmetry	0.759354	0.773689
sensory perception of pain	0.759354	0.773689
vasculogenesis	0.759354	0.773689
adult locomotory behavior	0.759354	0.773689
cellular membrane fusion	0.759354	0.773689
stem cell maintenance	0.759354	0.773689
activation of JUN kinase activity	0.759354	0.773689
muscle organ development	0.790336	0.804389
neuron differentiation	0.790336	0.804389
vesicle mediated transport	0.791733	0.805376
induction of apoptosis by extracellular signals	0.816183	0.829354
central nervous system development	0.816183	0.829354
cell proliferation	0.844969	0.858143
cell division	0.858802	0.871724
dorsal ventral pattern formation	0.86255	0.874587
camera type eye development	0.86255	0.874587
somitogenesis	0.869688	0.880407
spliceosomal snRNP assembly	0.869688	0.880407
gene silencing by RNA	0.869688	0.880407
synaptic transmission	0.918715	0.92954
immune response	0.929502	0.939952
anatomical structure morphogenesis	0.942652	0.951212
intracellular protein kinase cascade	0.942652	0.951212
chemotaxis	0.942652	0.951212
cellular component movement	0.942652	0.951212
negative regulation of apoptosis	0.945543	0.95362
positive regulation of cell growth	0.968763	0.971334
microtubule based process	0.968763	0.971334
muscle contraction	0.968763	0.971334
somatic stem cell maintenance	0.968763	0.971334
Notch signaling pathway	0.968763	0.971334
hair follicle development	0.968763	0.971334
neuron projection development	0.968763	0.971334
positive regulation of DNA replication	0.968763	0.971334
forebrain development	0.968763	0.971334
regulation of cell cycle	0.968763	0.971334
response to glucose stimulus	0.968763	0.971334
G protein coupled receptor protein signaling pathway	0.979997	0.981036
translation	0.979997	0.981036
ion transport	0.979997	0.981036
interspecies interaction between organisms	0.983439	0.98396
RNA processing	0.998867	0.998867
